# Supplementary material for: Correlative evidence for co-regulation of phosphorus and carbon exchanges with symbiotic fungus in the arbuscular mycorrhizal Medicago truncatula
Source: PubMed Central journal article supplement (PMC6844471; doi:10.1371/journal.pone.0224938), 2019-11-11

(A) Exp 1 - roots

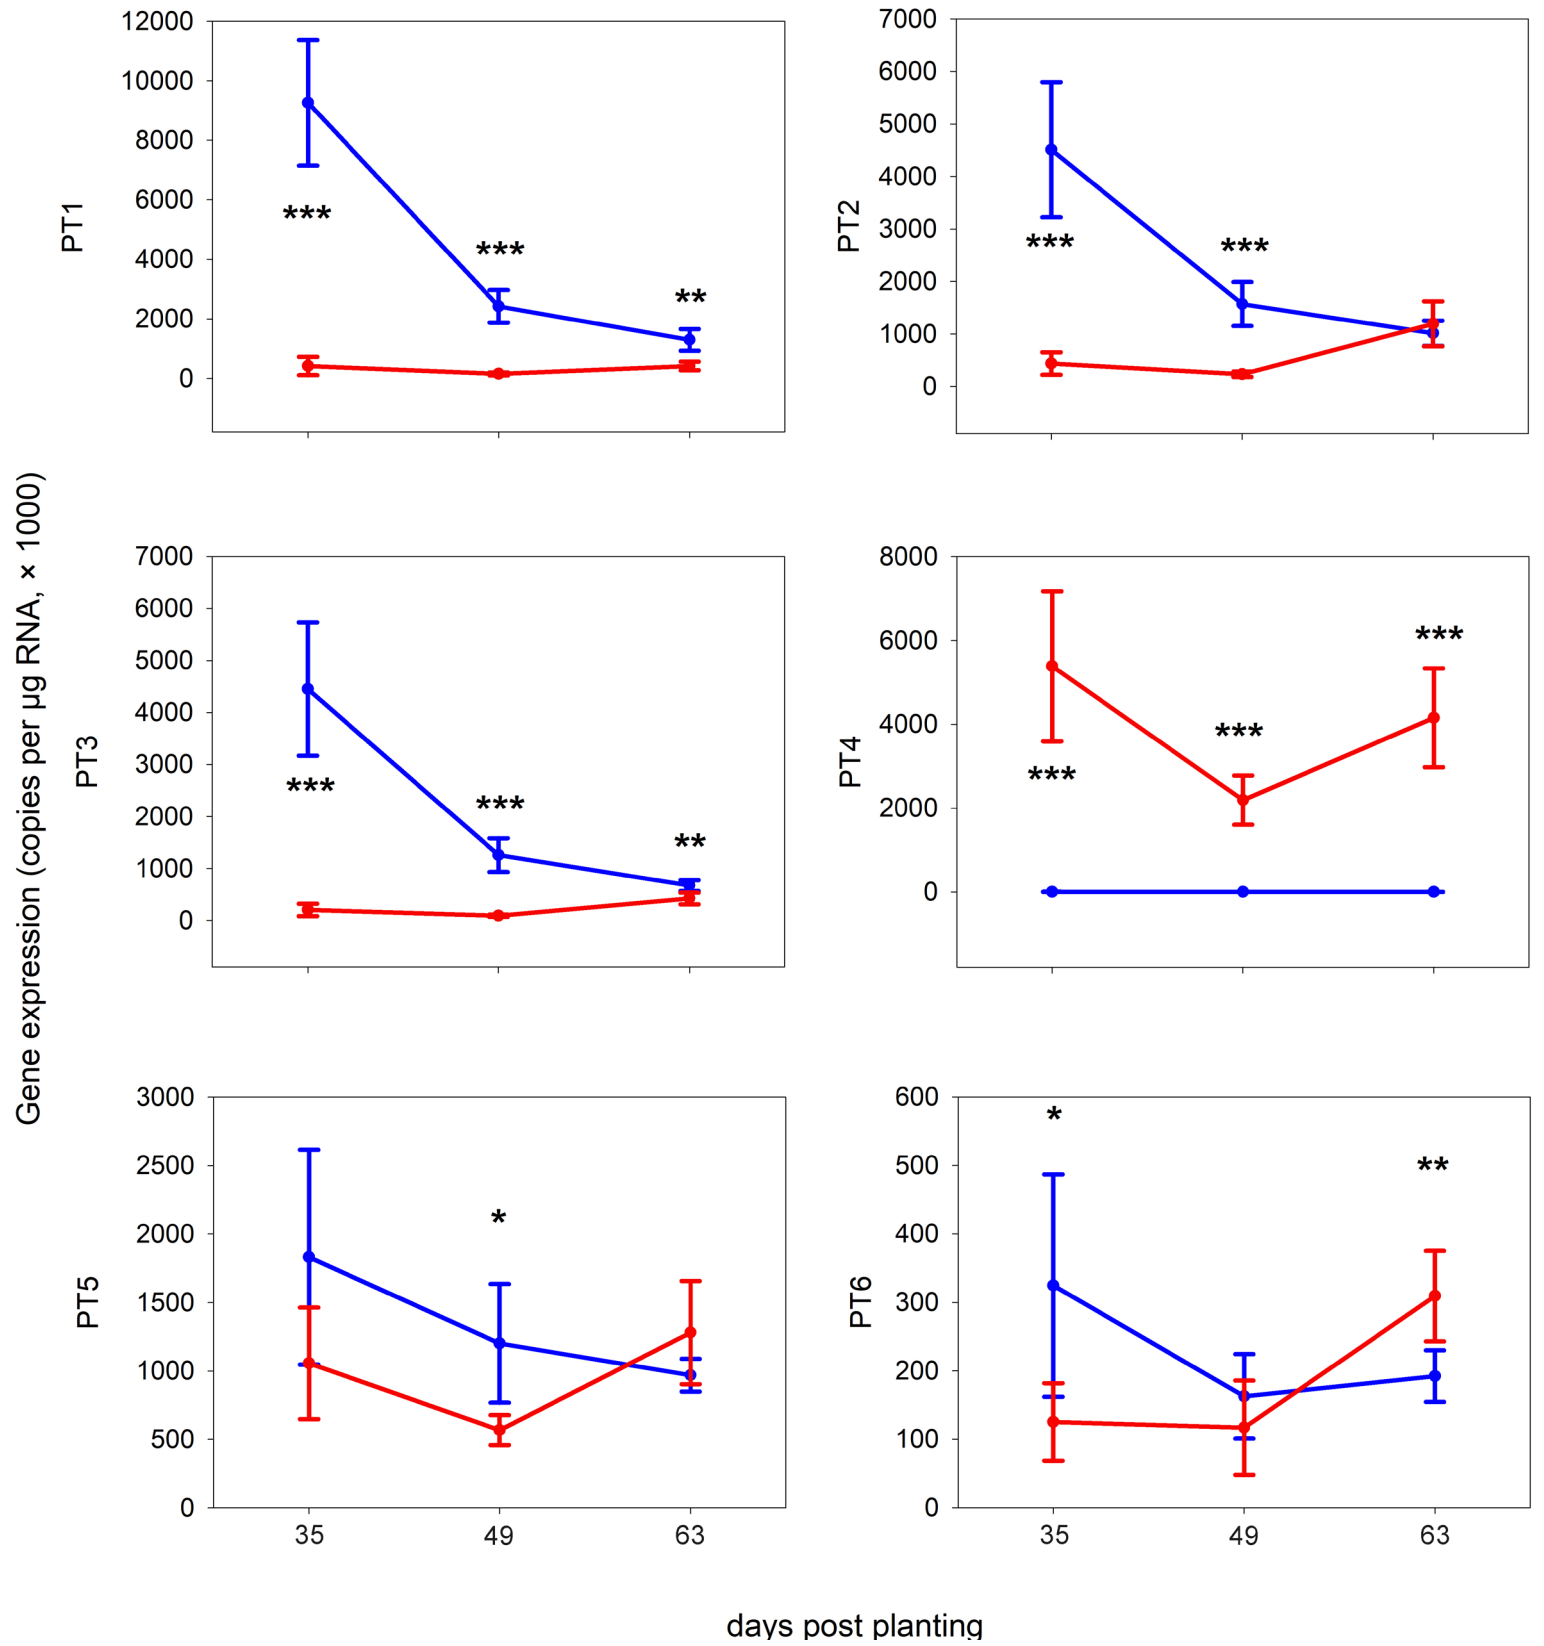

(A) Exp 1 - roots

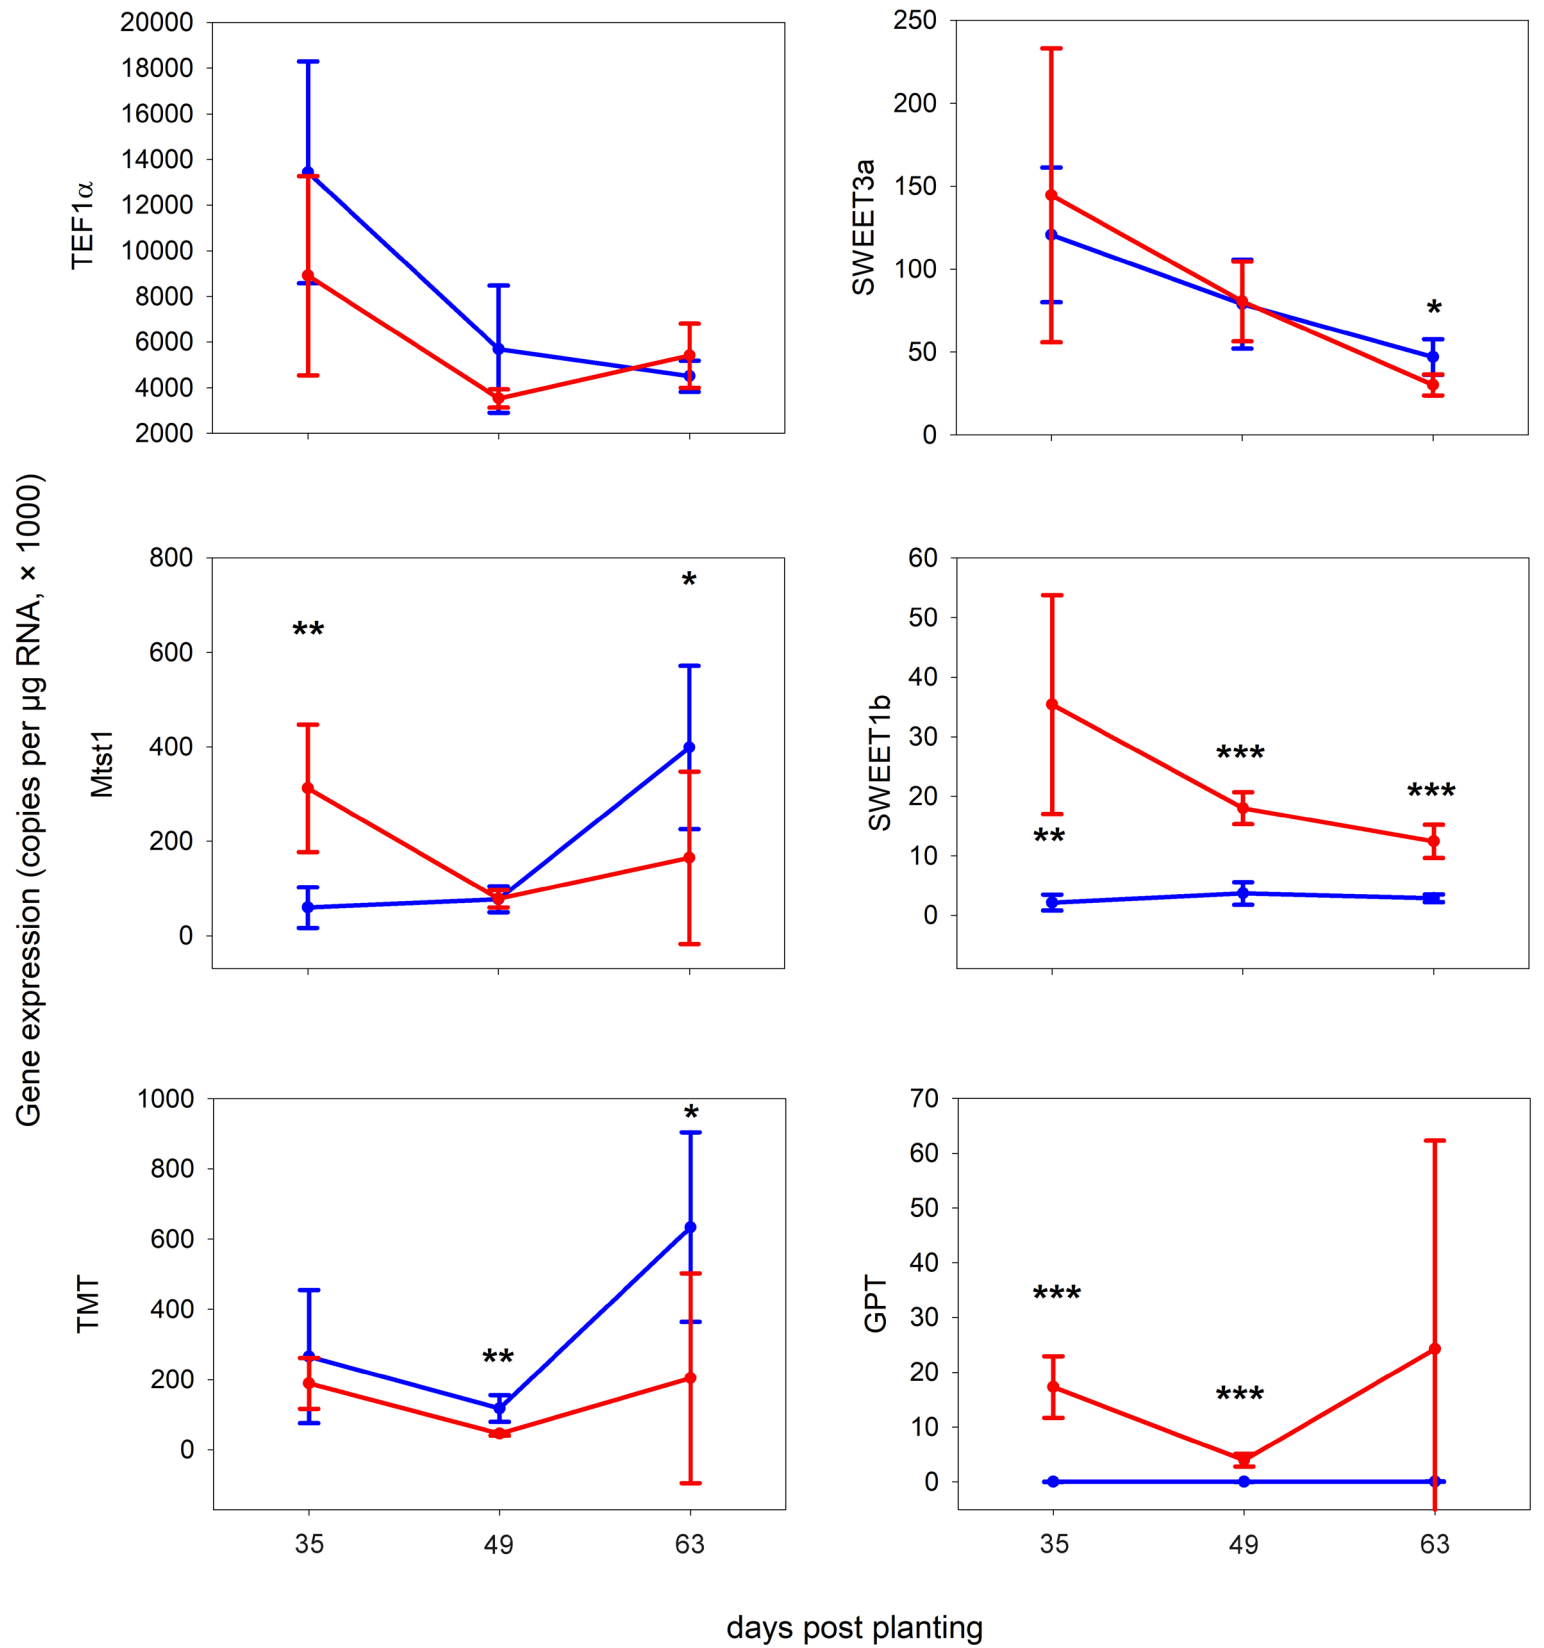

(A) Exp 1 - roots

Gene expression (copies per  $\mu\text{g}$  RNA,  $\times 1000$ )

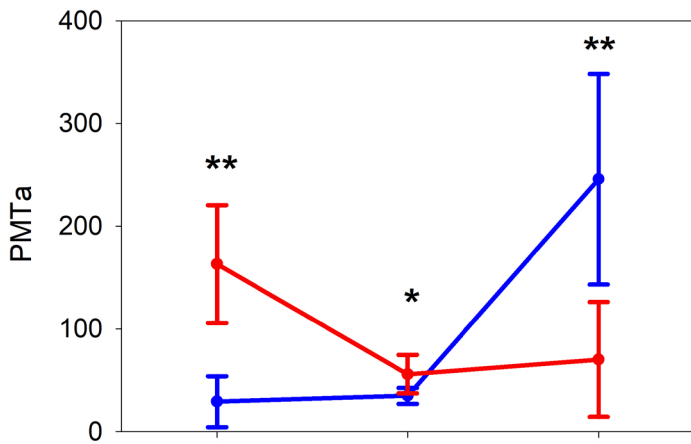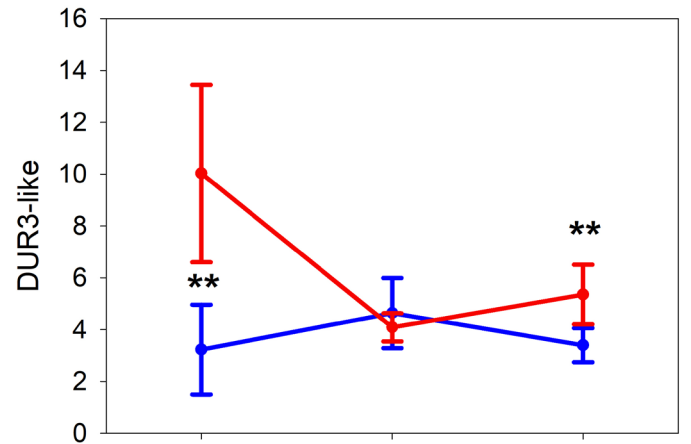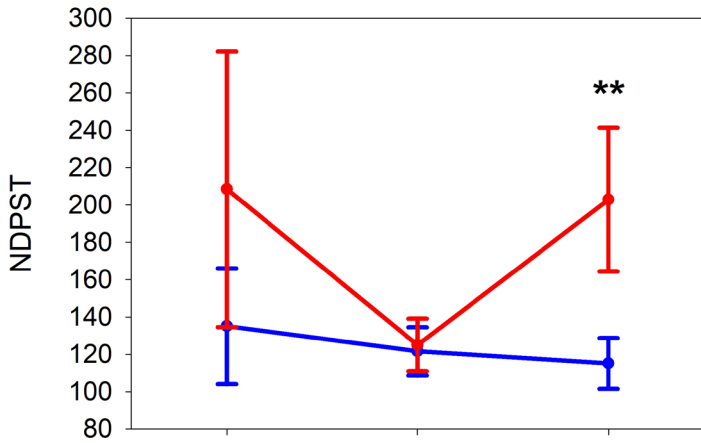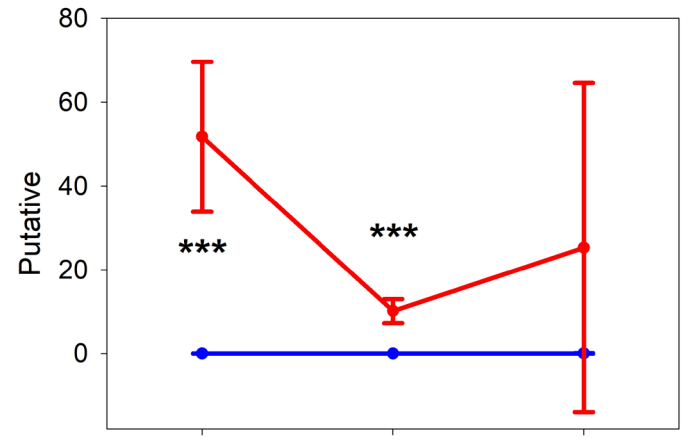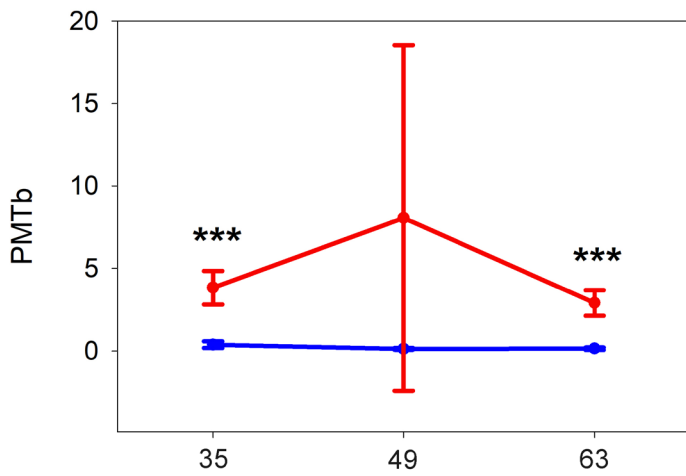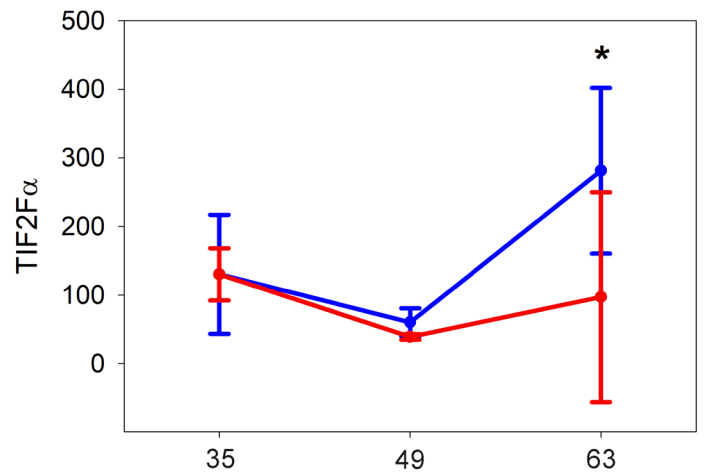

days post planting

(B) Exp 1 - shoots

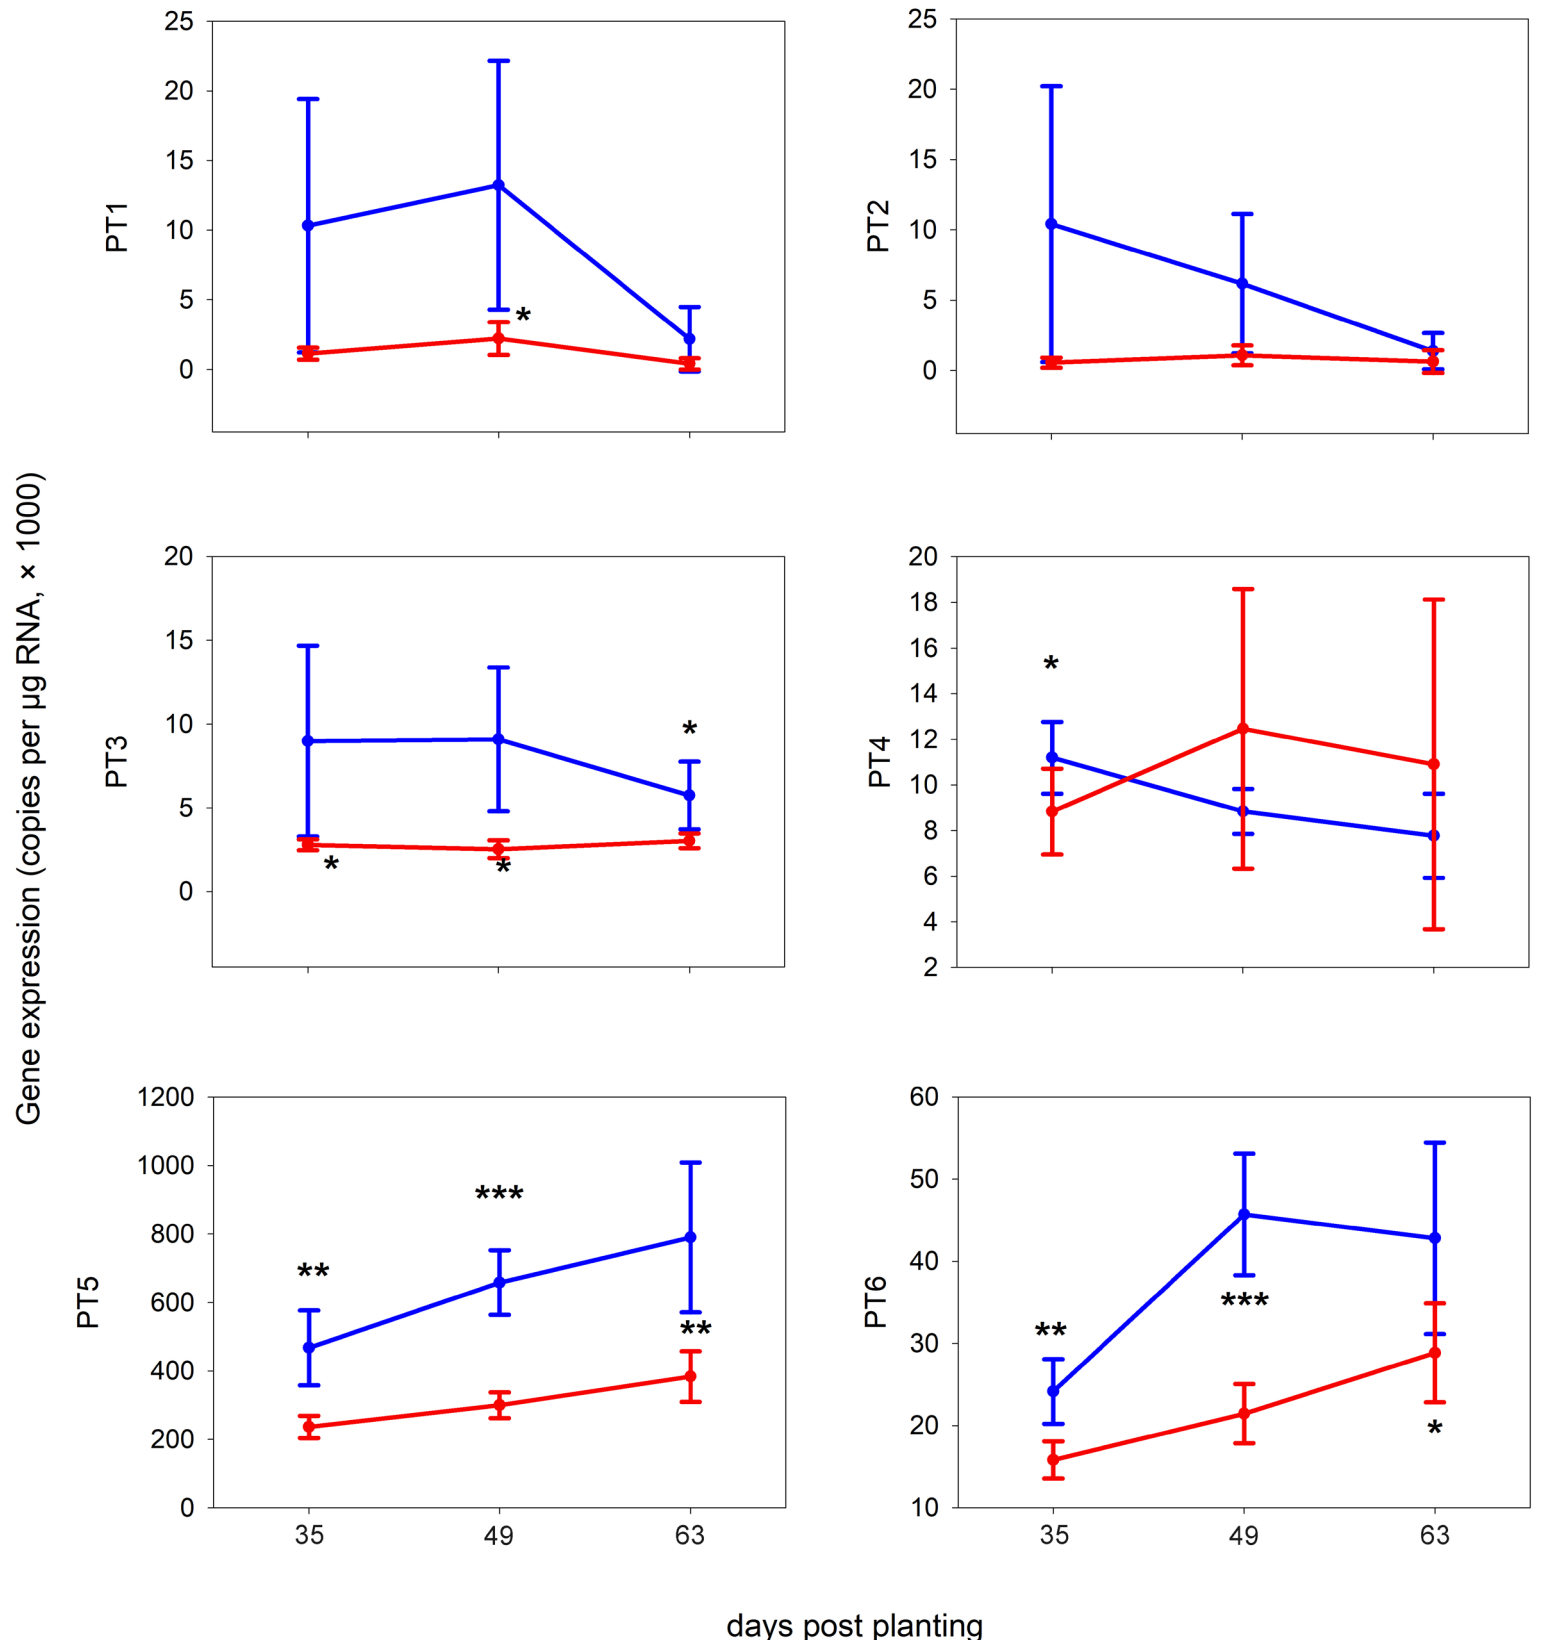

(B) Exp 1 - shoots

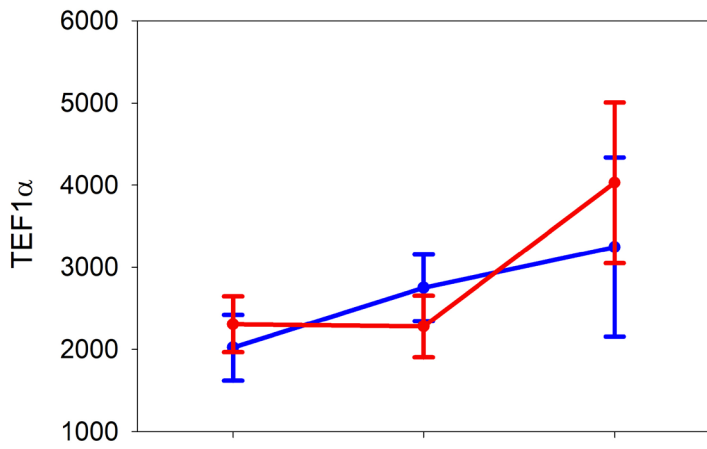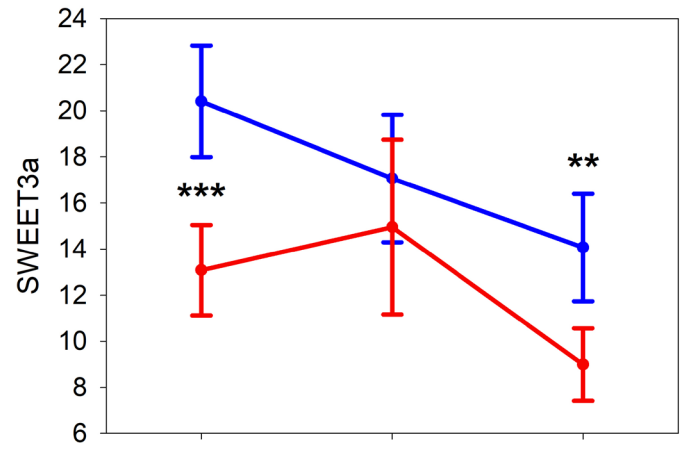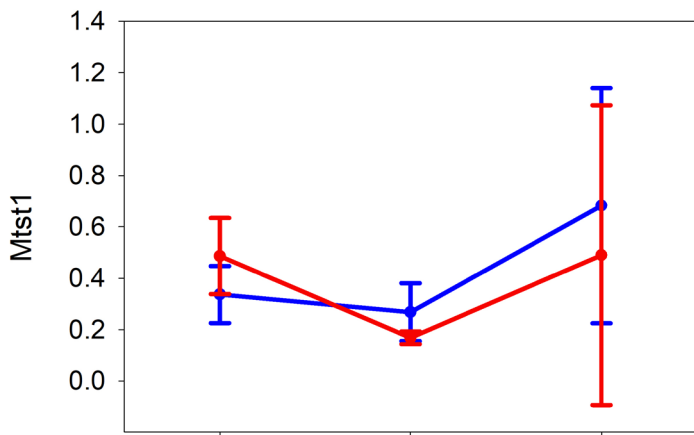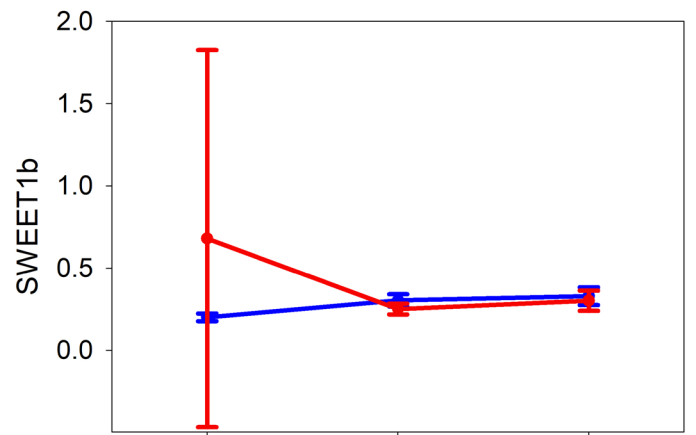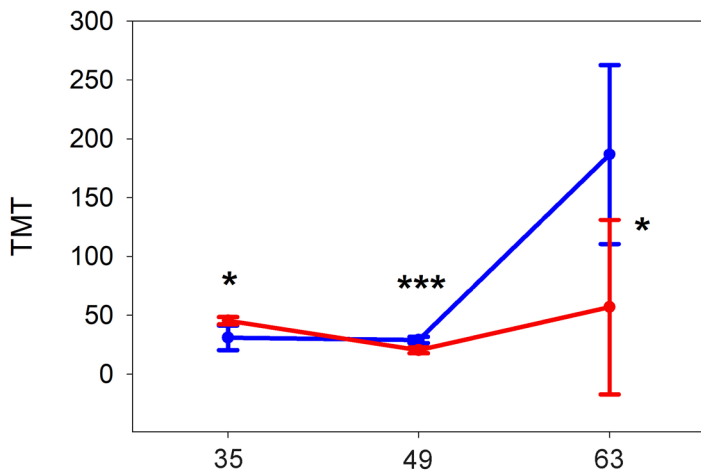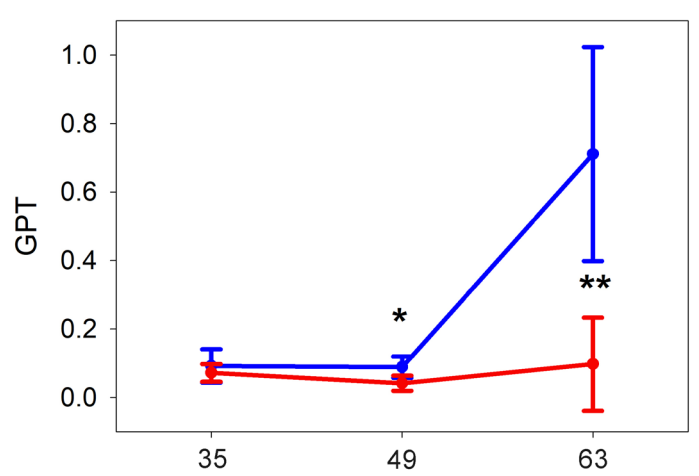

days post planting

Gene expression (copies per  $\mu\text{g}$  RNA,  $\times 1000$ )

(B) Exp 1 - shoots

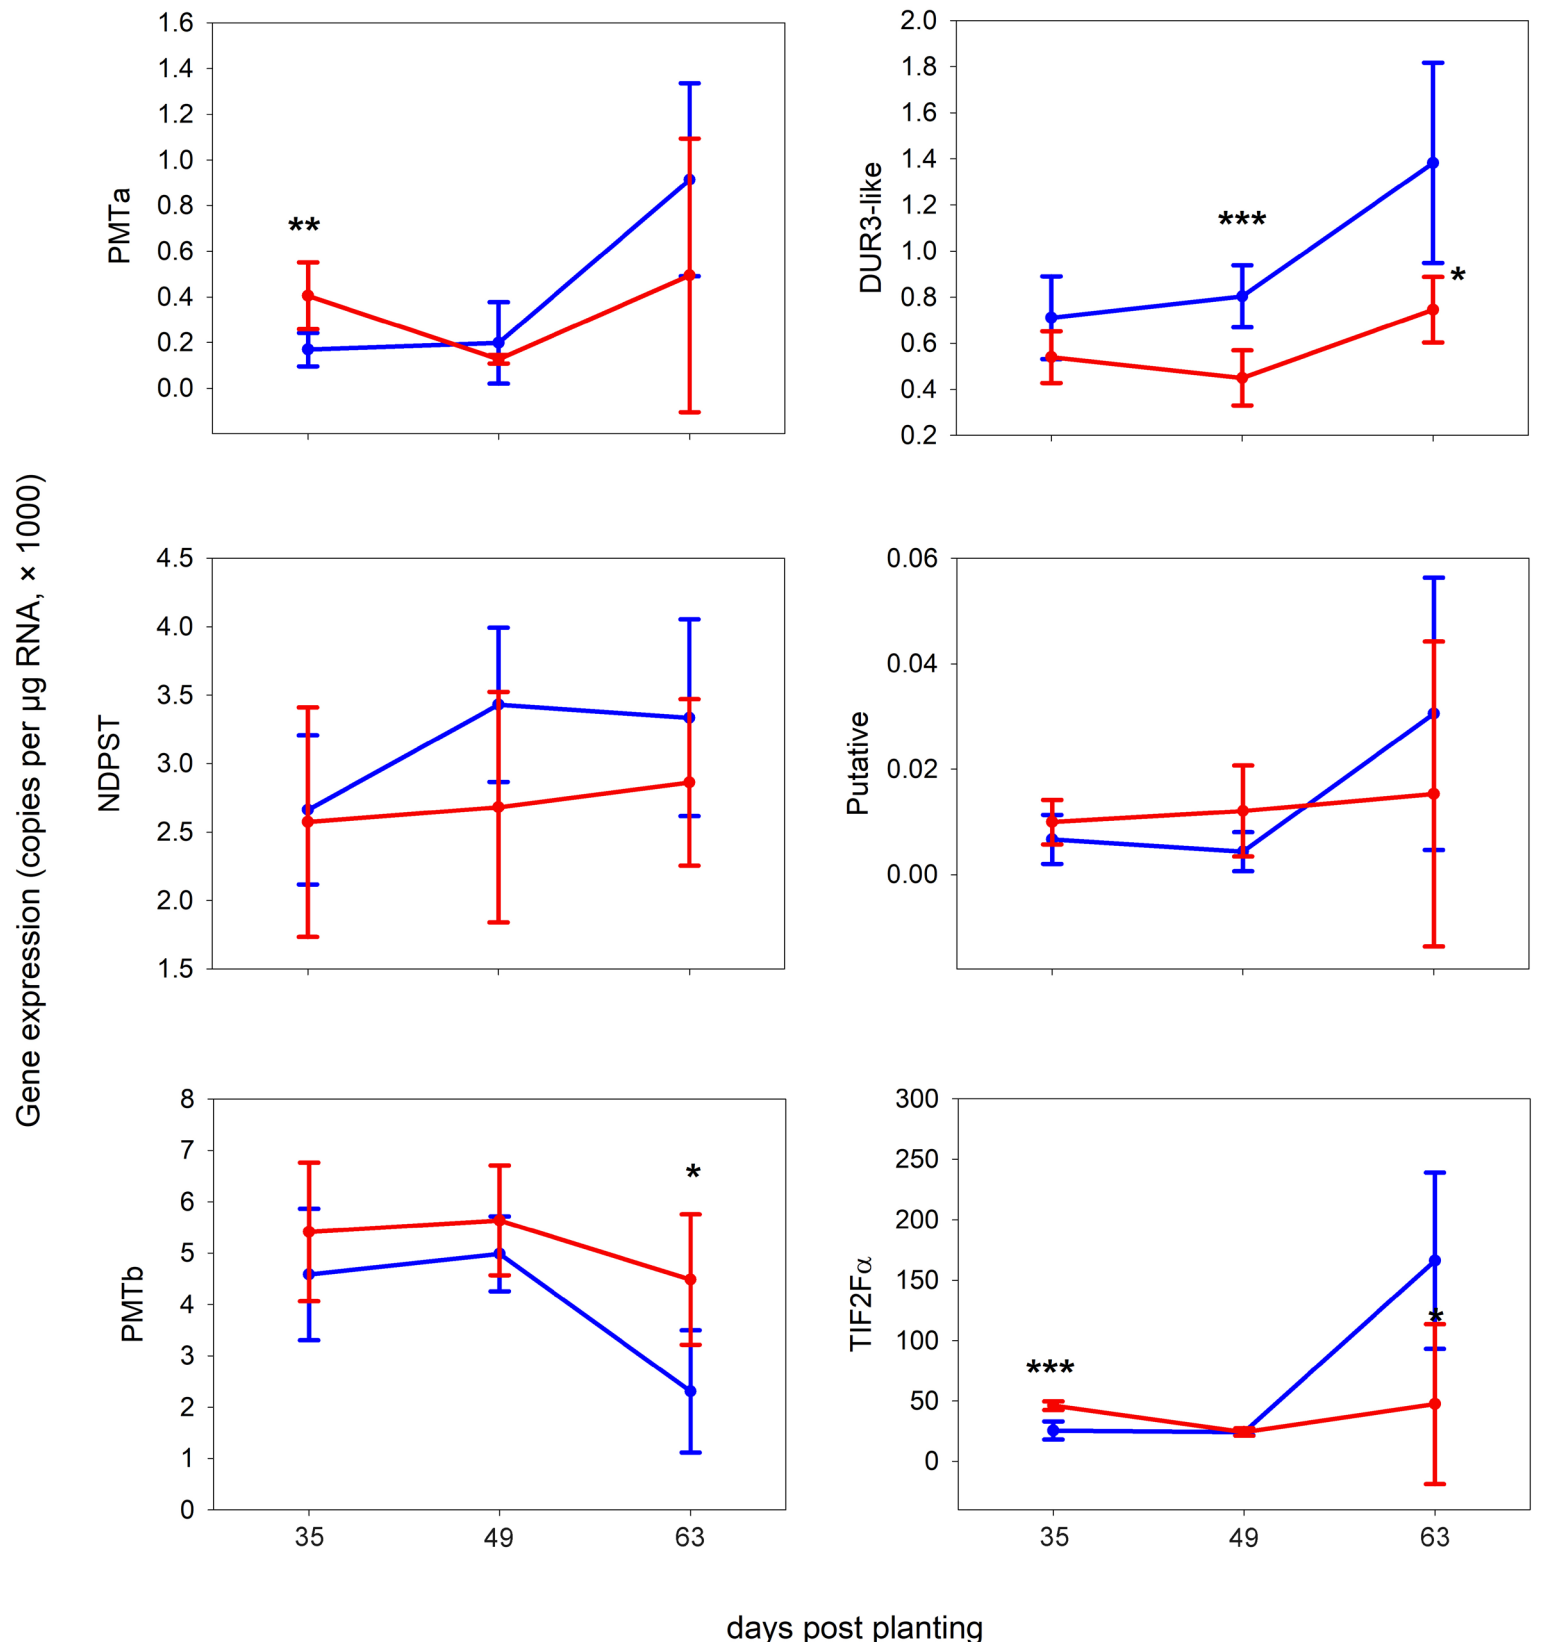

(C) Exp 2 - roots

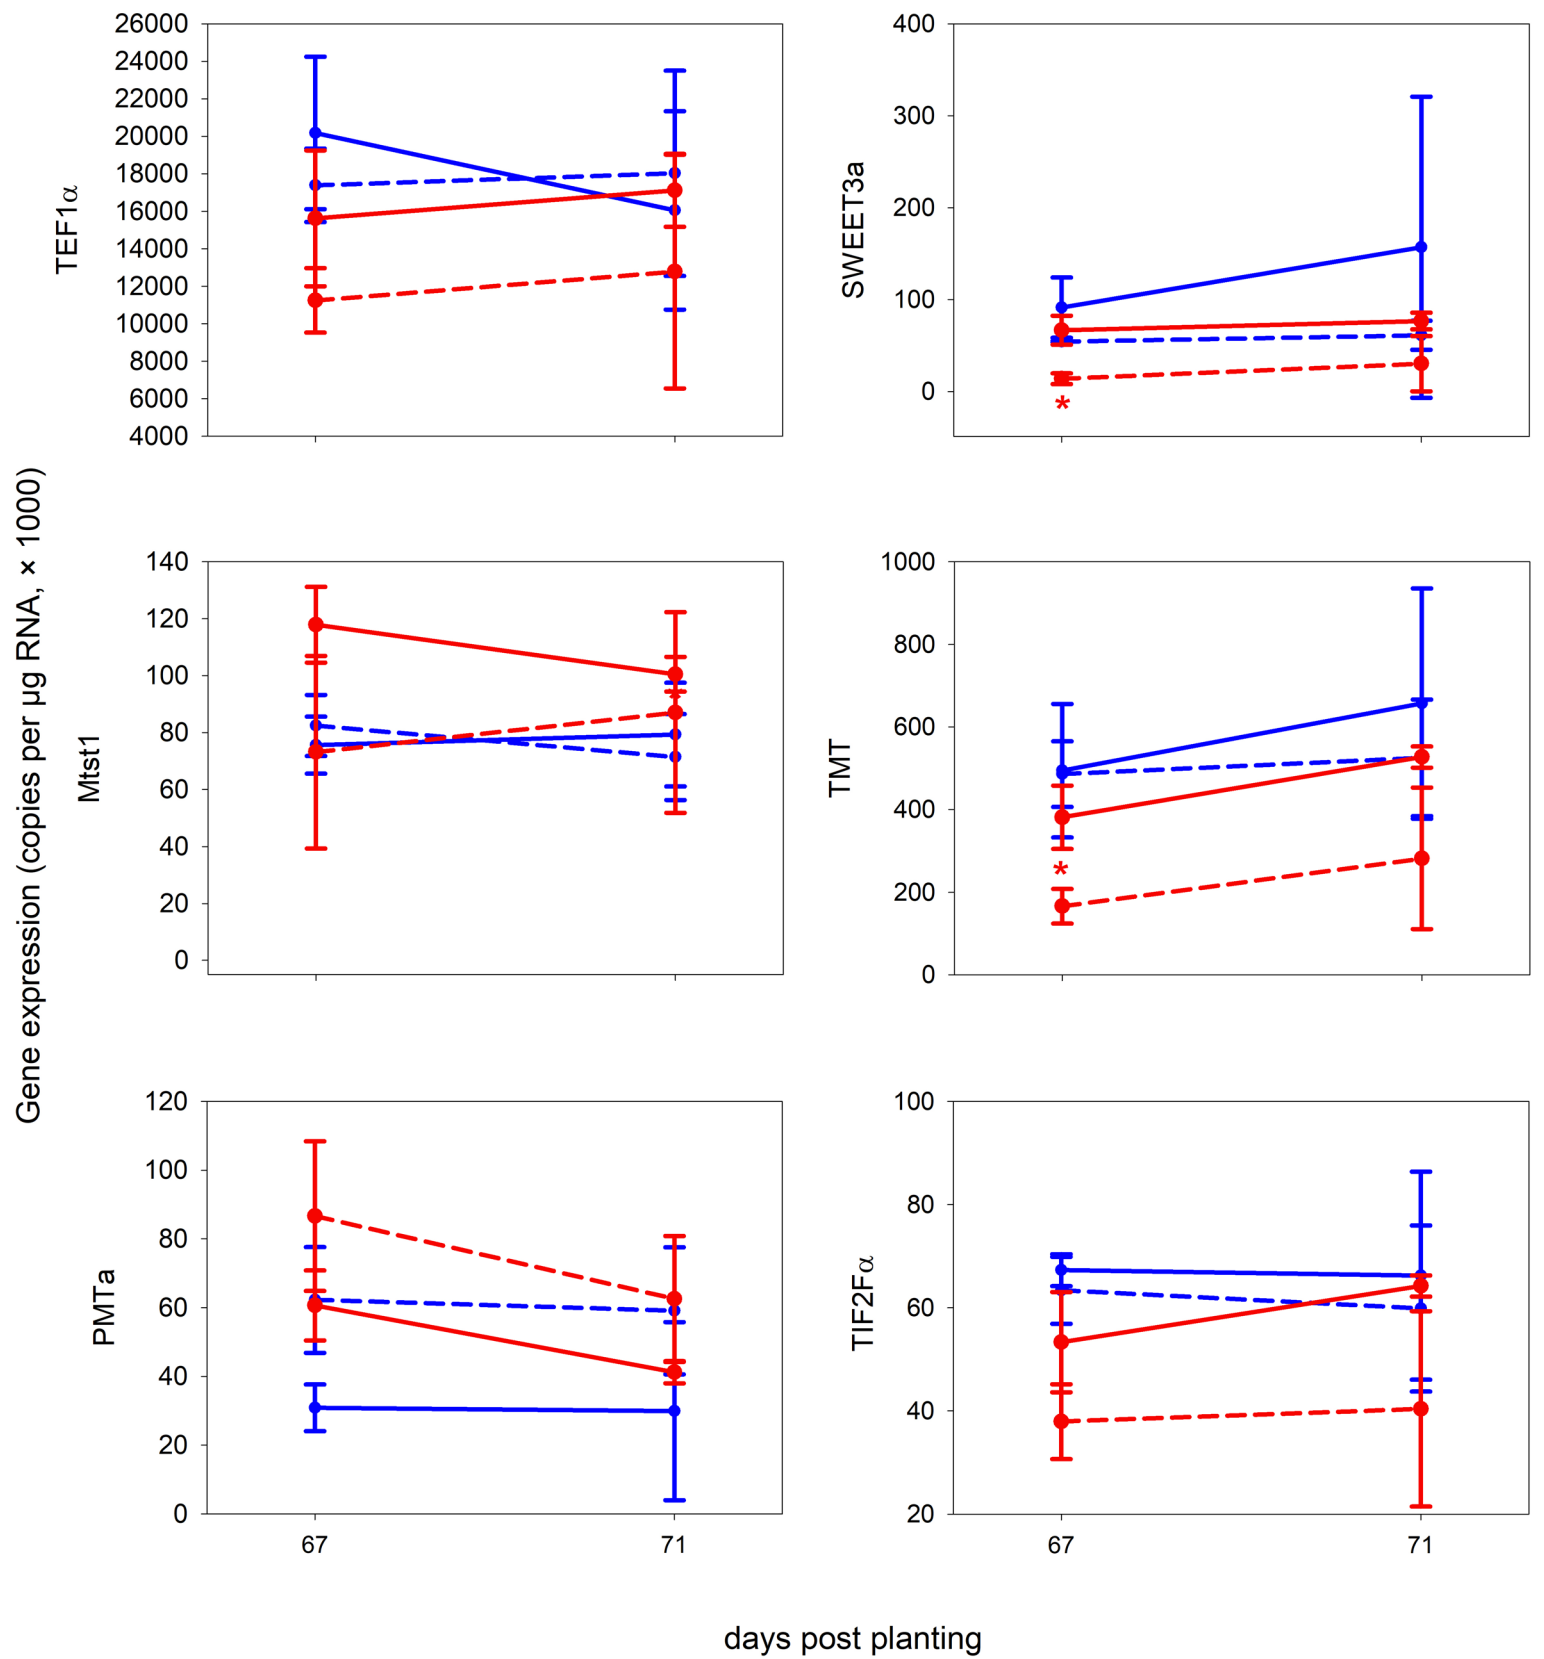

(D) Exp 2 - shoots

Gene expression (copies per  $\mu\text{g}$  RNA,  $\times 1000$ )

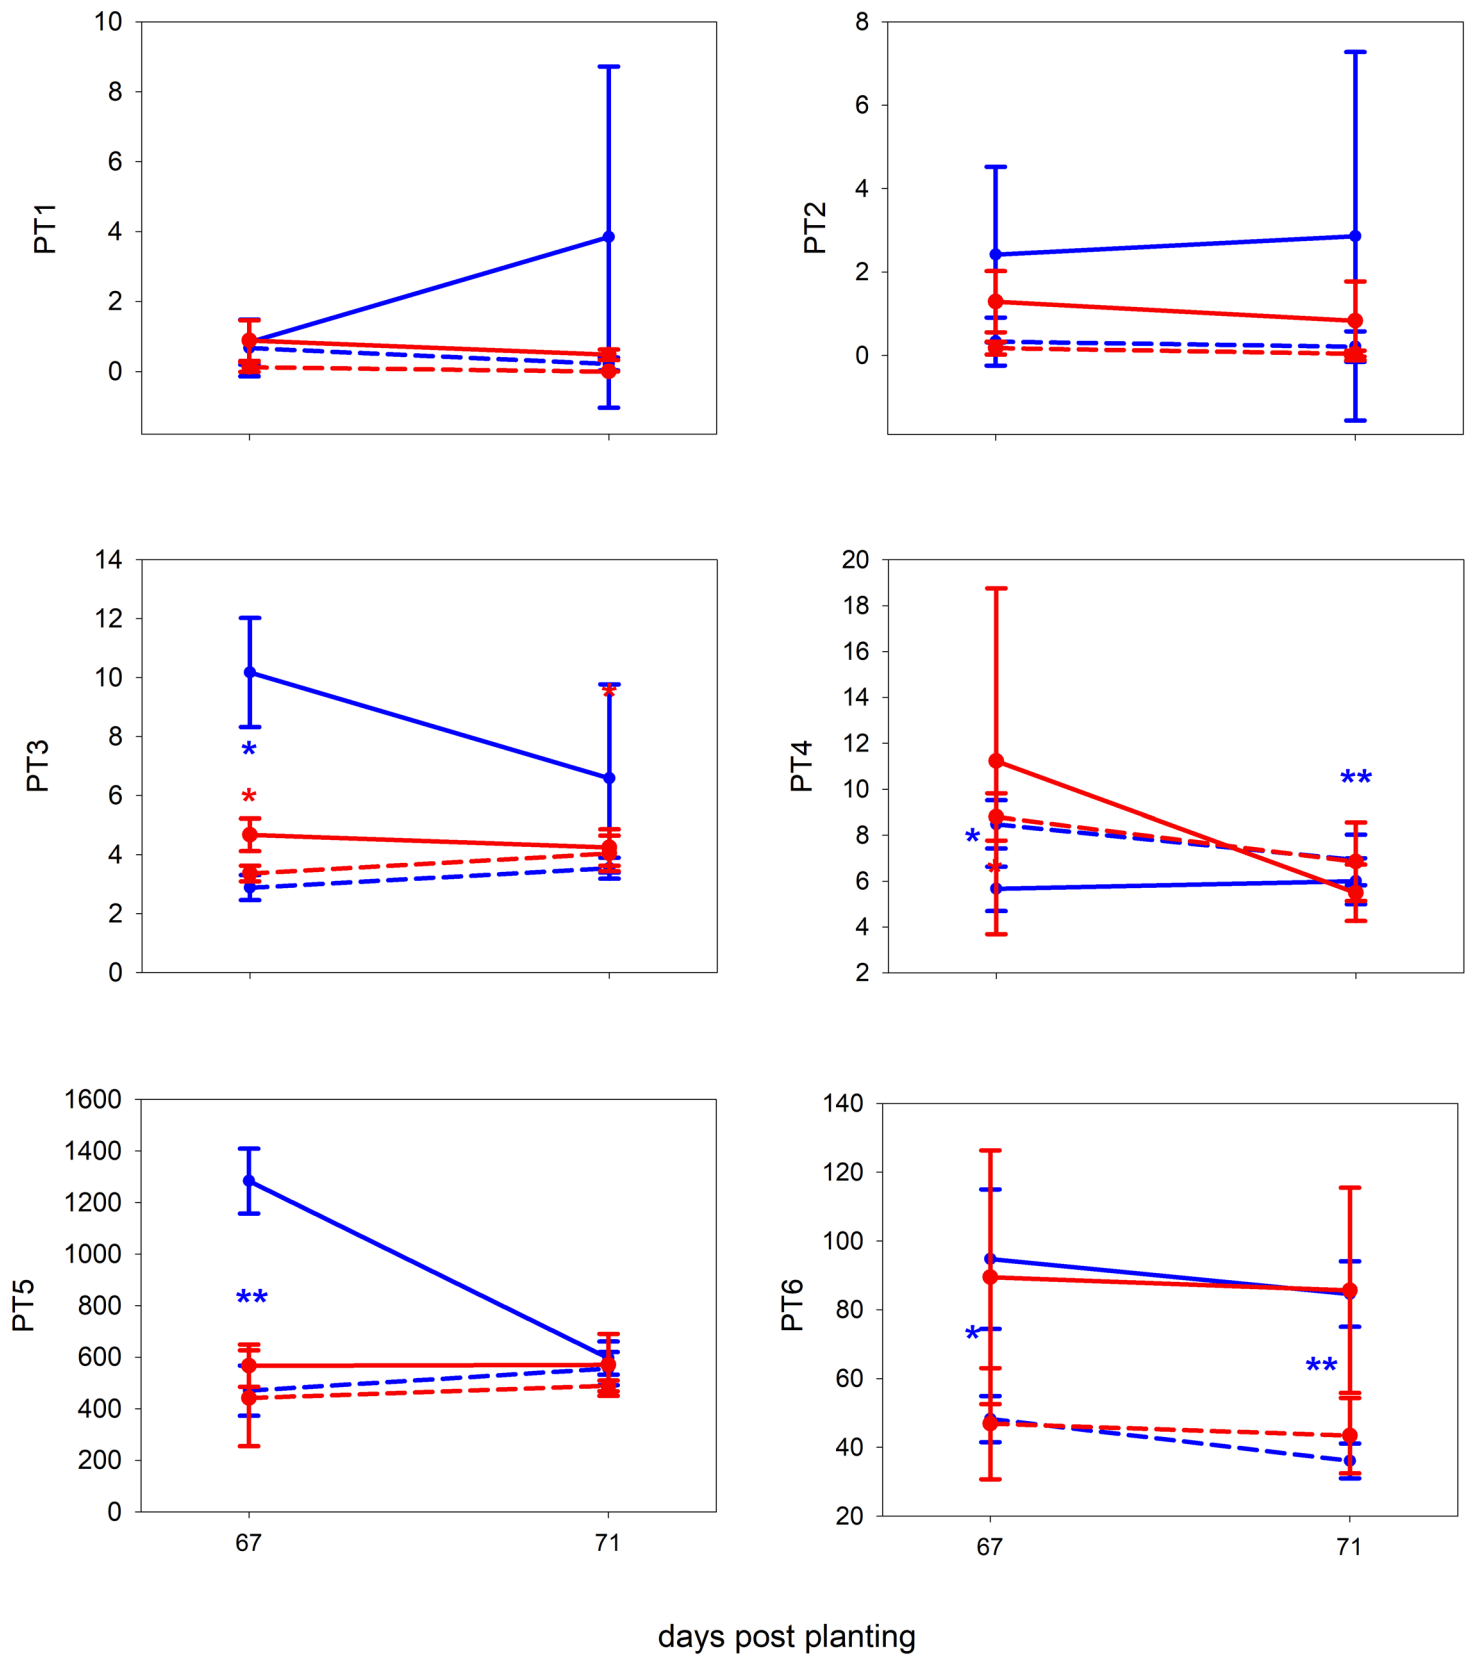



(D) Exp 2 - shoots

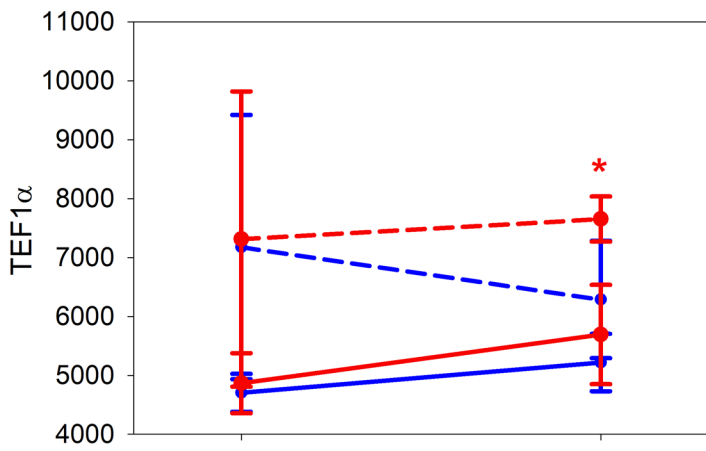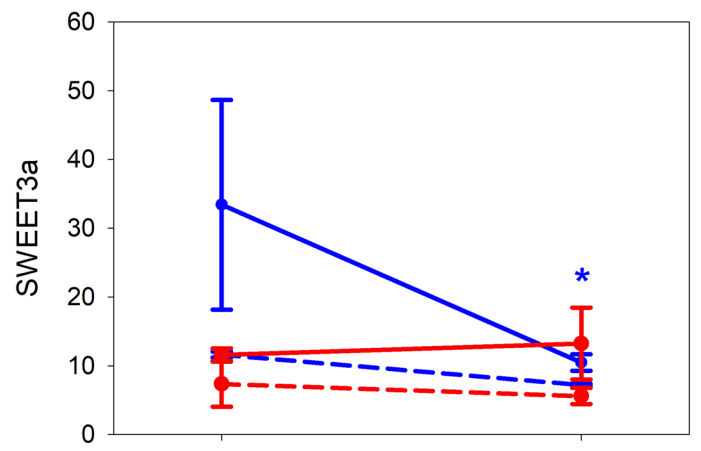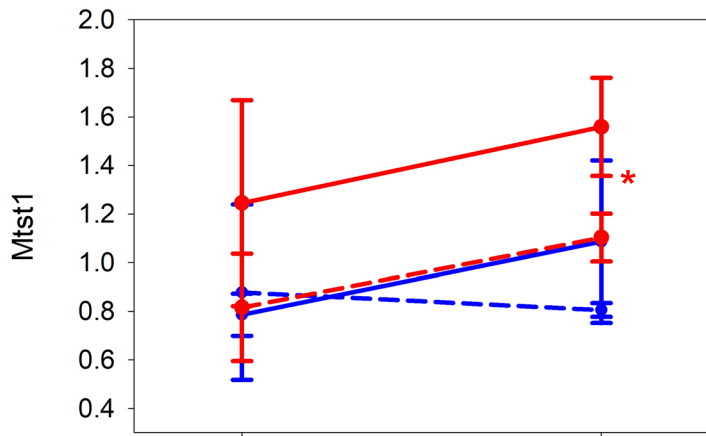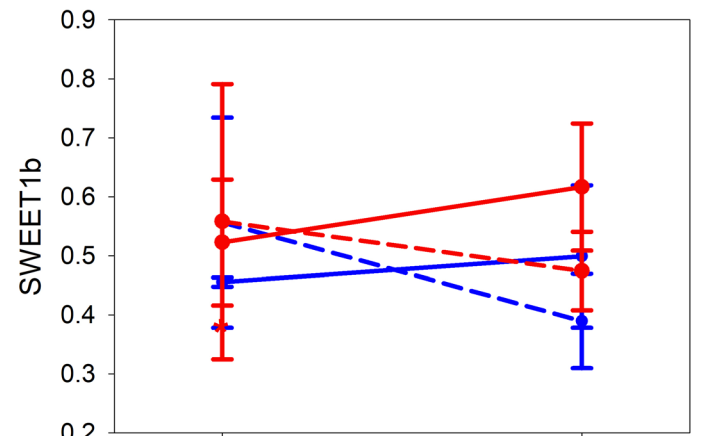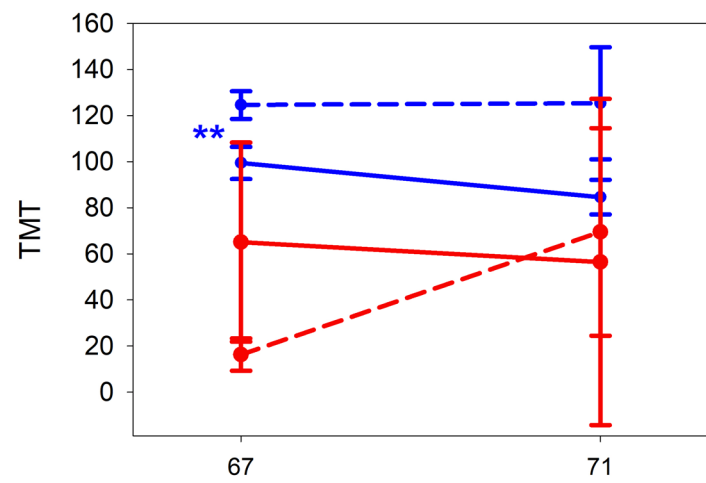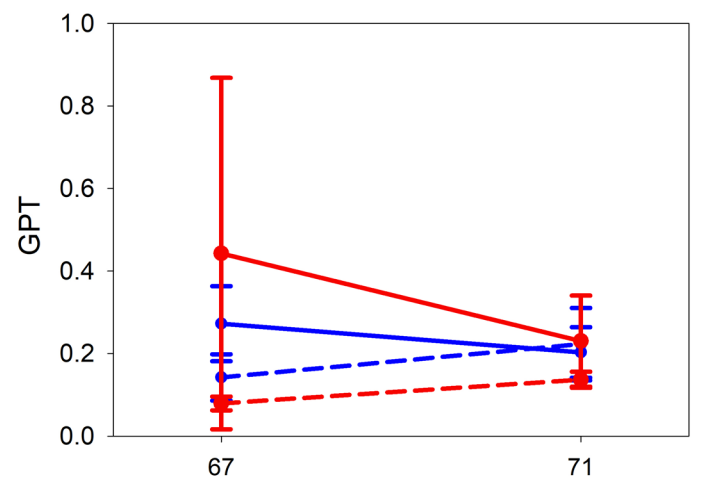

Gene expression (copies per  $\mu\text{g}$  RNA,  $\times 1000$ )

days post planting

(D) Exp 2 - shoots

Gene expression (copies per  $\mu\text{g}$  RNA,  $\times 1000$ )

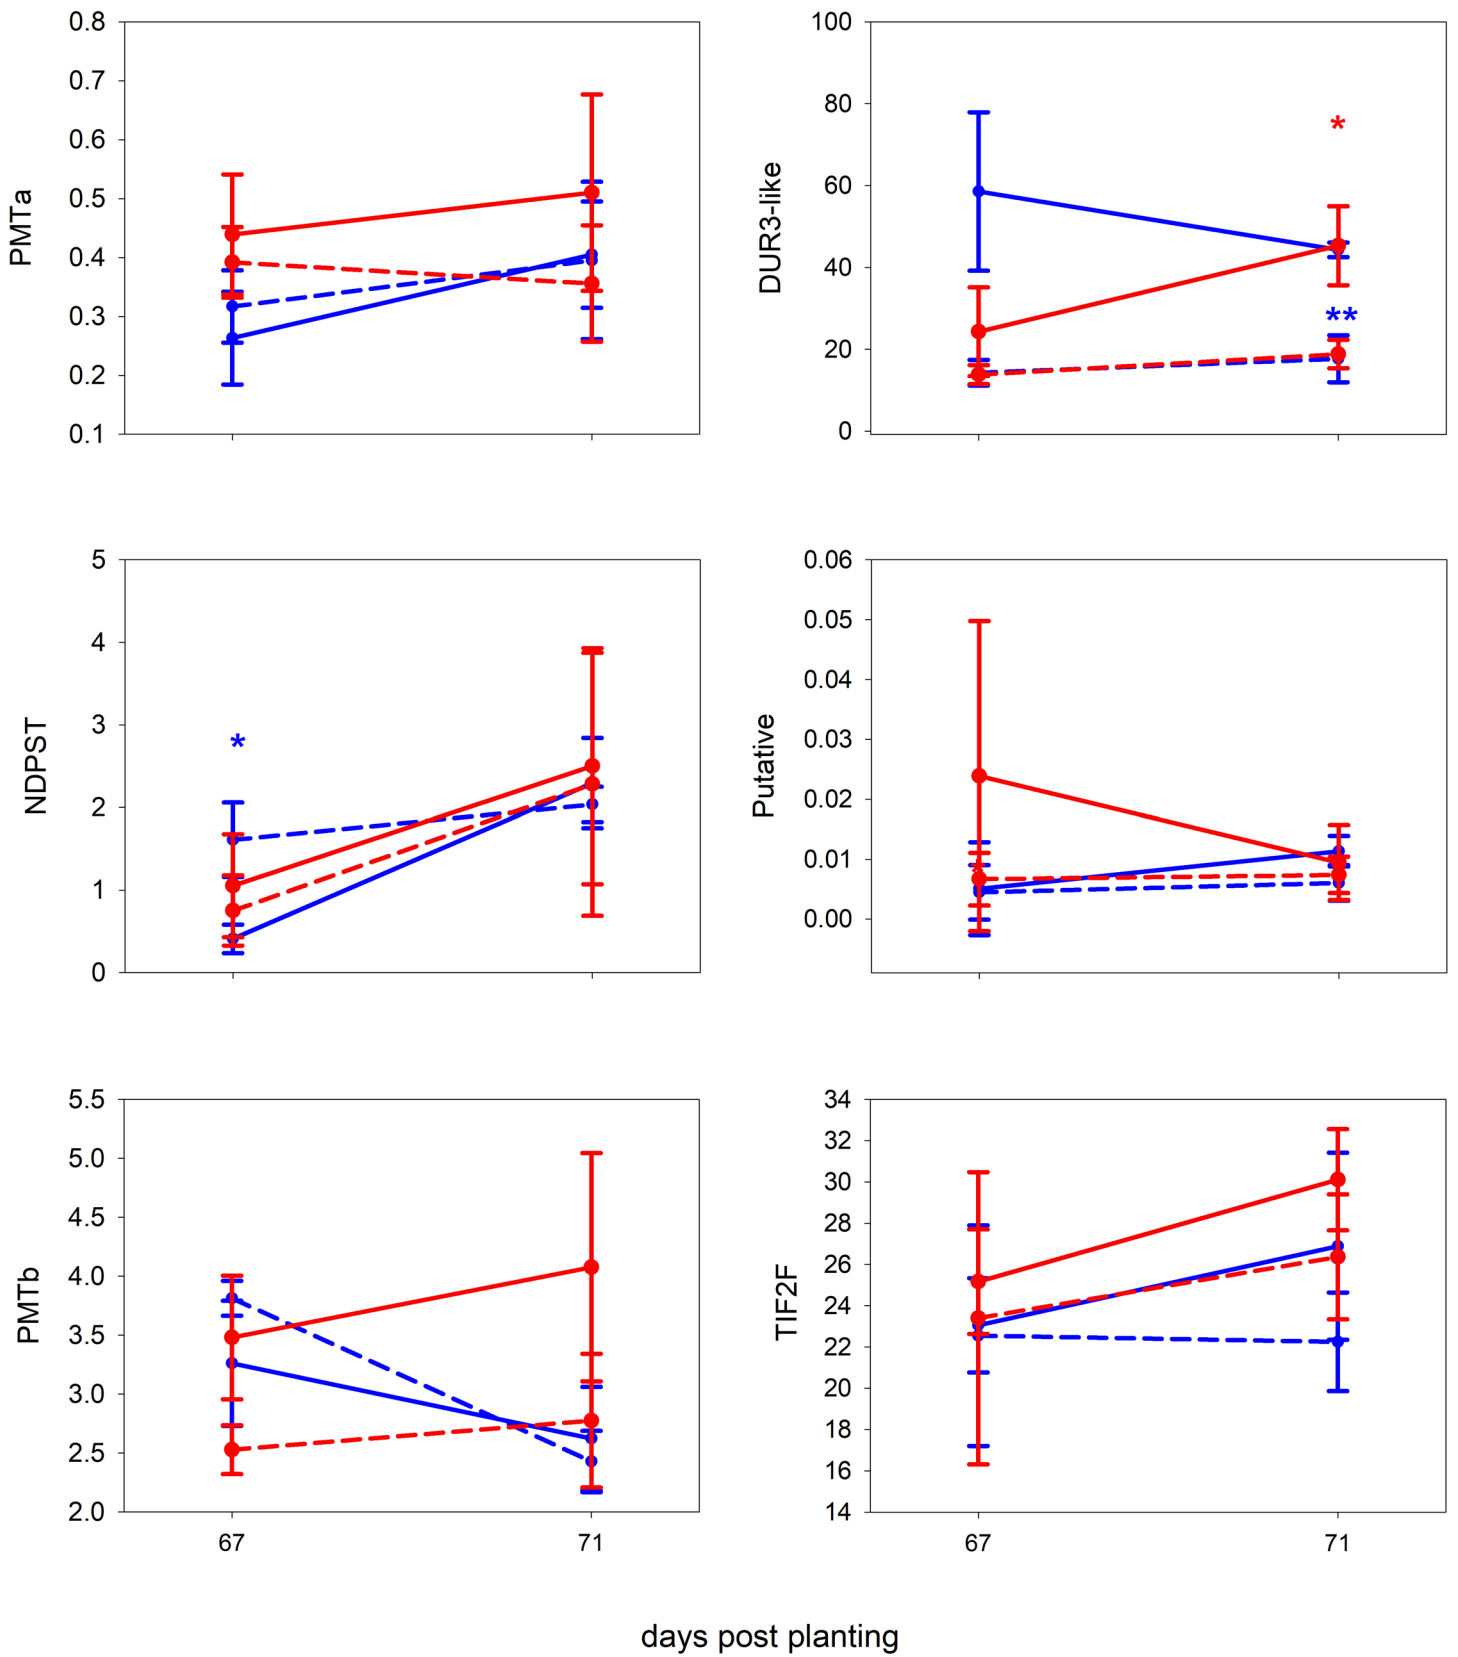

Supplement: pone.0224938.s010.pdf [file pone.0224938.s010.pdf]
