# Supplementary material for: Correlative evidence for co-regulation of phosphorus and carbon exchanges with symbiotic fungus in the arbuscular mycorrhizal Medicago truncatula
Source: PubMed Central journal article supplement (PMC6844471; doi:10.1371/journal.pone.0224938), 2019-11-11
Supplement: pone.0224938.s005.pdf [file pone.0224938.s005.pdf]

Assay Class: Plant RNA Nano  
 Data Path: D:\...00 expert\_Plant RNA Nano\_DE34904209\_2015-04-22\_12-16-22.xad

Created: 4/22/2015 12:16:22 PM  
 Modified: 4/22/2015 12:40:15 PM

**Electrophoresis File Run Summary**

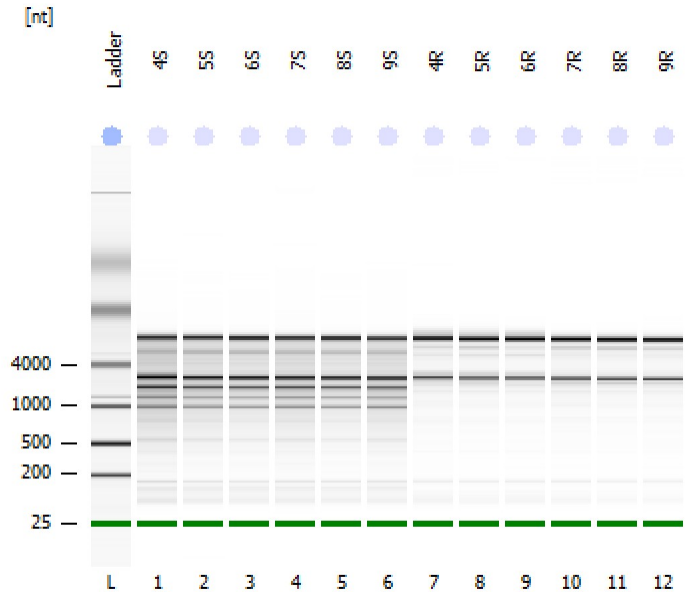

Instrument Information:

Instrument Name: IMG-CORE-AGILENT      Firmware: C.01.069  
 Serial#: DE34904209      Type: G2938C

Assay Information:

Assay Origin Path: C:\Program Files\Agilent\2100 bioanalyzer\2100 expert\assays\RNA\Plant RNA Nano.xsy

Assay Class: Plant RNA Nano  
 Version: 1.3  
 Assay Comments: Total RNA Analysis ng sensitivity (Plant)

© Copyright 2003 - 2009 Agilent Technologies, Inc.

Chip Information:

Chip Lot #:   
 Reagent Kit Lot #:   
 Chip Comments:

**4S**  
 Jansa\_MBU, RNA  
 RIN: 5.90

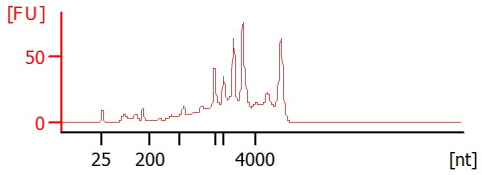

**5S**  
 Jansa\_MBU, RNA  
 RIN: 6.10

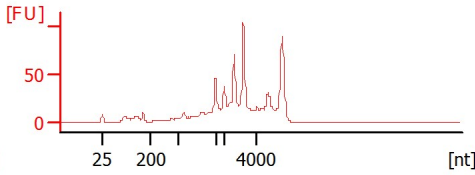

**6S**  
 Jansa\_MBU, RNA  
 RIN: 6.40

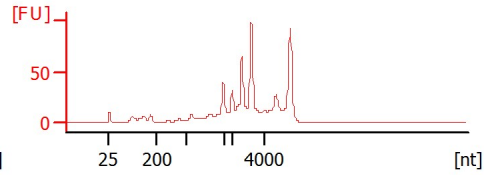

**7S**  
 Jansa\_MBU, RNA  
 RIN: 6.10

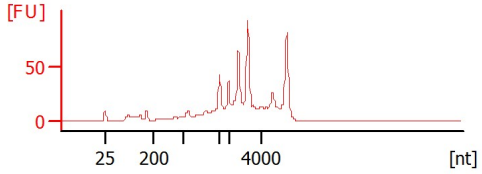

**8S**  
 Jansa\_MBU, RNA  
 RIN: 6.40

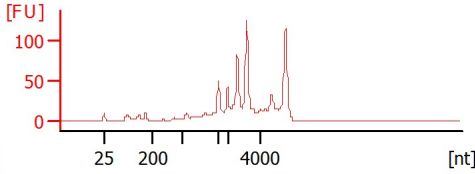

**9S**  
 Jansa\_MBU, RNA  
 RIN: 6.10

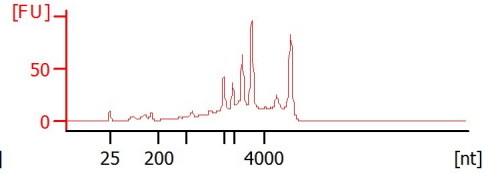

**4R**  
 Jansa\_MBU, RNA  
 RIN: 9

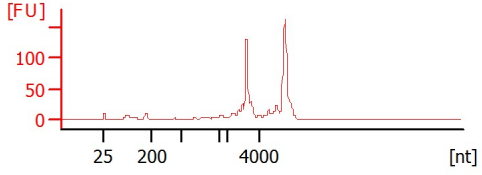

**5R**  
 Jansa\_MBU, RNA  
 RIN: 9.20

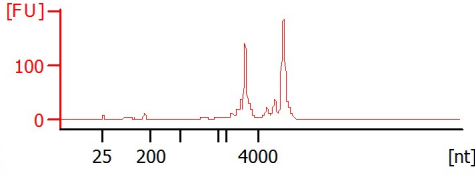

**6R**  
 Jansa\_MBU, RNA  
 RIN: 9.40

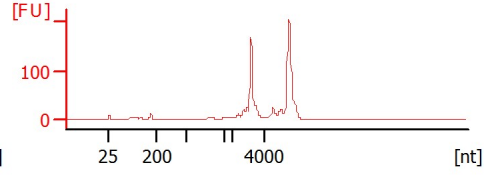

**7R**  
 Jansa\_MBU, RNA  
 RIN: 8.90

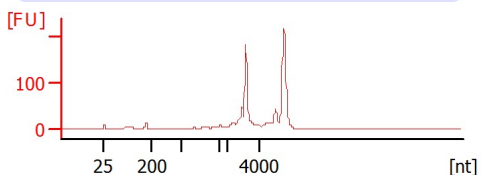

**8R**  
 Jansa\_MBU, RNA  
 RIN: 9.30

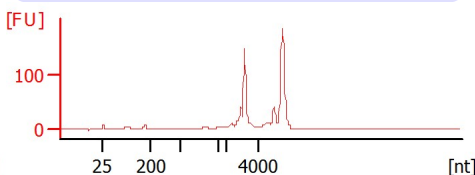

**9R**  
 Jansa\_MBU, RNA  
 RIN: 9.20

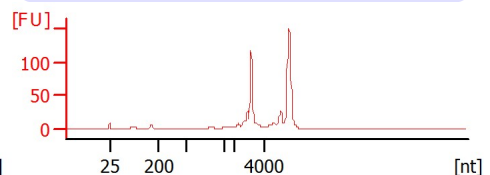

Assay Class: Plant RNA Nano  
 Data Path: D:\...00 expert\_Plant RNA Nano\_DE34904209\_2015-04-22\_12-16-22.xad

Created: 4/22/2015 12:16:22 PM  
 Modified: 4/22/2015 12:40:15 PM

**Electrophoresis File Run Summary (Chip Summary)**

| Sample Name | Sample Comment | Status | Result Label      | Result Color |
|-------------|----------------|--------|-------------------|--------------|
| 4S          | Jansa_MBU, RNA | ✓      | RIN: 5.90         |              |
| 5S          | Jansa_MBU, RNA | ✓      | RIN: 6.10         |              |
| 6S          | Jansa_MBU, RNA | ✓      | RIN: 6.40         |              |
| 7S          | Jansa_MBU, RNA | ✓      | RIN: 6.10         |              |
| 8S          | Jansa_MBU, RNA | ✓      | RIN: 6.40         |              |
| 9S          | Jansa_MBU, RNA | ✓      | RIN: 6.10         |              |
| 4R          | Jansa_MBU, RNA | ✓      | RIN:9             |              |
| 5R          | Jansa_MBU, RNA | ✓      | RIN: 9.20         |              |
| 6R          | Jansa_MBU, RNA | ✓      | RIN: 9.40         |              |
| 7R          | Jansa_MBU, RNA | ✓      | RIN: 8.90         |              |
| 8R          | Jansa_MBU, RNA | ✓      | RIN: 9.30         |              |
| 9R          | Jansa_MBU, RNA | ✓      | RIN: 9.20         |              |
| Ladder      |                | ✓      | All Other Samples |              |

**Chip Lot #**

**Reagent Kit Lot #**

**Chip Comments :**

Assay Class: Plant RNA Nano  
Data Path: D:\...00 expert\_Plant RNA Nano\_DE34904209\_2015-04-22\_12-16-22.xad

Created: 4/22/2015 12:16:22 PM  
Modified: 4/22/2015 12:40:15 PM

## Electrophoresis Assay Details

### General Analysis Settings

Number of Available Sample and Ladder Wells (Max.) : 13

Minimum Visible Range [s] : 17

Maximum Visible Range [s] : 70

Start Analysis Time Range [s] : 19

End Analysis Time Range [s] : 69

Ladder Concentration [ng/ $\mu$ l] : 150

Lower Marker Concentration [ng/ $\mu$ l] : 0

Upper Marker Concentration [ng/ $\mu$ l] : 0

Used Lower Marker for Quantitation

Standard Curve Fit is Logarithmic

Show Data Aligned to Lower Marker

### Integrator Settings

Integration Start Time [s] : 19

Integration End Time [s] : 69

Slope Threshold : 0.6

Height Threshold [FU] : 0.2

Area Threshold : 0.1

Width Threshold [s] : 0.2

Baseline Plateau [s] : 6

### Filter Settings

Filter Width [s] : 0.5

Polynomial Order : 4

### Ladder

| Ladder Peak | Size |
|-------------|------|
| 1           | 25   |
| 2           | 200  |
| 3           | 500  |
| 4           | 1000 |
| 5           | 2000 |
| 6           | 4000 |

Assay Class: Plant RNA Nano  
 Data Path: D:\...00 expert\_Plant RNA Nano\_DE34904209\_2015-04-22\_12-16-22.xad

Created: 4/22/2015 12:16:22 PM  
 Modified: 4/22/2015 12:40:15 PM

**Electropherogram Summary**

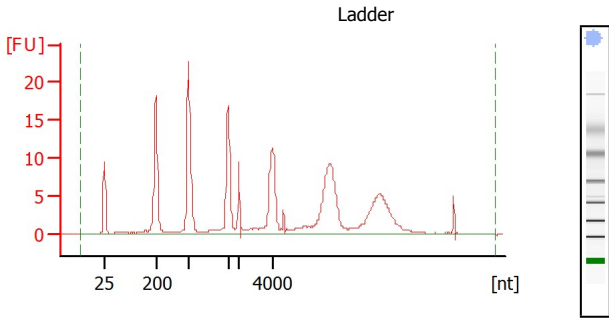

**Overall Results for Ladder**

RNA Area: 212.7  
 RNA Concentration: 150 ng/μl  
 Result Flagging Color:    
 Result Flagging Label: All Other Samples

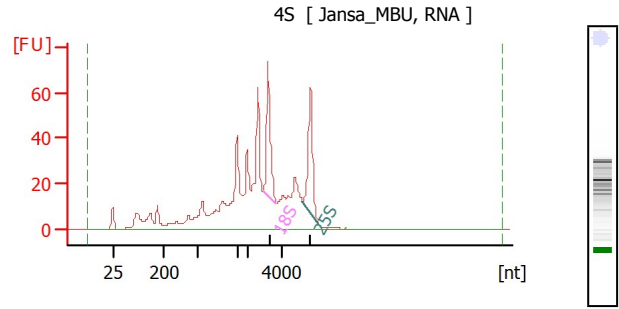

**Overall Results for sample 1 : 4S**

RNA Area: 801.8  
 RNA Concentration: 565 ng/μl  
 rRNA Ratio [25s / 18s]: 1.0  
 RNA Integrity Number (RIN): 5.9 (B.02.08)  
 Result Flagging Color:    
 Result Flagging Label: RIN: 5.90

**Fragment table for sample 1 : 4S**

| Name | Start Size [nt] | End Size [nt] | Area | % of total Area |
|------|-----------------|---------------|------|-----------------|
| 18S  | 2,879           | 3,688         | 72.1 | 9.0             |
| 25S  | 5,209           | 6,141         | 74.6 | 9.3             |

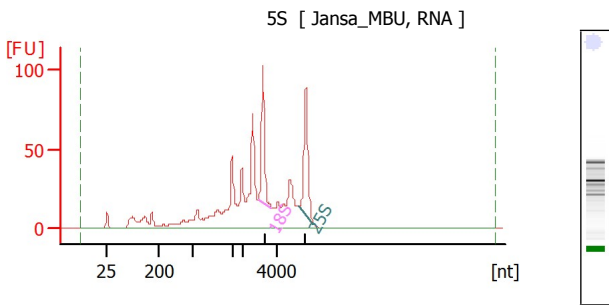

**Overall Results for sample 2 : 5S**

RNA Area: 875.4  
 RNA Concentration: 617 ng/μl  
 rRNA Ratio [25s / 18s]: 1.1  
 RNA Integrity Number (RIN): 6.1 (B.02.08)  
 Result Flagging Color:    
 Result Flagging Label: RIN: 6.10

**Fragment table for sample 2 : 5S**

| Name | Start Size [nt] | End Size [nt] | Area | % of total Area |
|------|-----------------|---------------|------|-----------------|
| 18S  | 2,869           | 3,673         | 85.5 | 9.8             |
| 25S  | 5,208           | 6,110         | 97.7 | 11.2            |

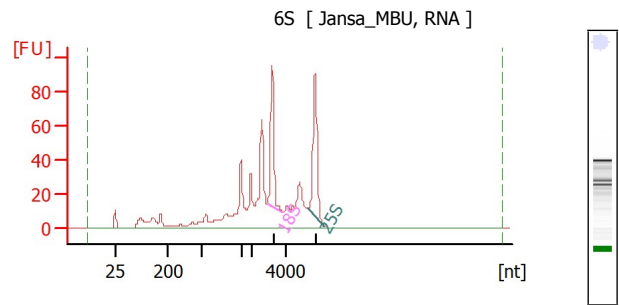

**Overall Results for sample 3 : 6S**

RNA Area: 747.6  
 RNA Concentration: 527 ng/μl  
 rRNA Ratio [25s / 18s]: 1.2  
 RNA Integrity Number (RIN): 6.4 (B.02.08)  
 Result Flagging Color:    
 Result Flagging Label: RIN: 6.40

**Fragment table for sample 3 : 6S**

| Name | Start Size [nt] | End Size [nt] | Area  | % of total Area |
|------|-----------------|---------------|-------|-----------------|
| 18S  | 2,860           | 3,683         | 86.6  | 11.6            |
| 25S  | 5,160           | 6,128         | 101.5 | 13.6            |

Assay Class: Plant RNA Nano  
 Data Path: D:\...00 expert\_Plant RNA Nano\_DE34904209\_2015-04-22\_12-16-22.xad

Created: 4/22/2015 12:16:22 PM  
 Modified: 4/22/2015 12:40:15 PM

**Electropherogram Summary Continued ...**

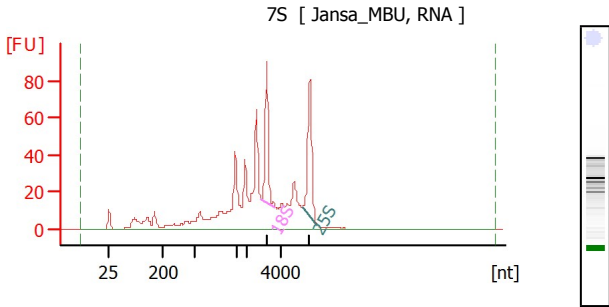

**Overall Results for sample 4 : 7S**  
 RNA Area: 776.2  
 RNA Concentration: 547 ng/µl  
 rRNA Ratio [25s / 18s]: 1.1  
 RNA Integrity Number (RIN): 6.1 (B.02.08)  
 Result Flagging Color:    
 Result Flagging Label: RIN: 6.10

**Fragment table for sample 4 : 7S**

| Name | Start Size [nt] | End Size [nt] | Area | % of total Area |
|------|-----------------|---------------|------|-----------------|
| 18S  | 2,870           | 3,665         | 77.8 | 10.0            |
| 25S  | 5,184           | 6,075         | 86.5 | 11.1            |

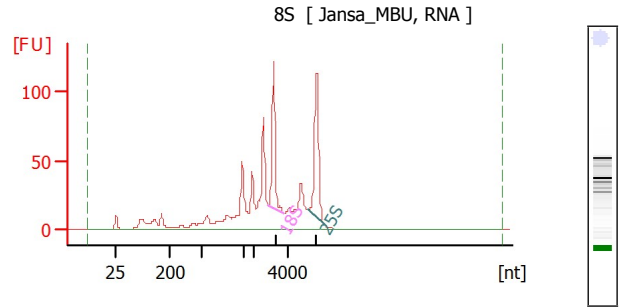

**Overall Results for sample 5 : 8S**  
 RNA Area: 894.9  
 RNA Concentration: 631 ng/µl  
 rRNA Ratio [25s / 18s]: 1.2  
 RNA Integrity Number (RIN): 6.4 (B.02.08)  
 Result Flagging Color:    
 Result Flagging Label: RIN: 6.40

**Fragment table for sample 5 : 8S**

| Name | Start Size [nt] | End Size [nt] | Area  | % of total Area |
|------|-----------------|---------------|-------|-----------------|
| 18S  | 2,846           | 3,689         | 106.7 | 11.9            |
| 25S  | 5,135           | 6,123         | 128.4 | 14.4            |

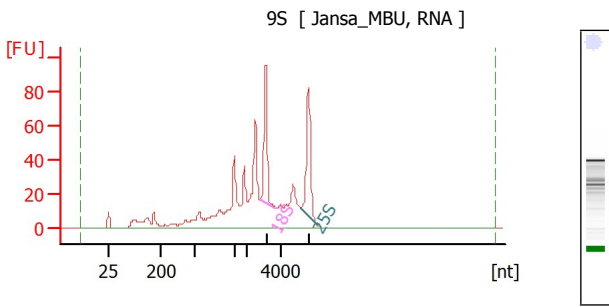

**Overall Results for sample 6 : 9S**  
 RNA Area: 784.8  
 RNA Concentration: 553 ng/µl  
 rRNA Ratio [25s / 18s]: 1.1  
 RNA Integrity Number (RIN): 6.1 (B.02.08)  
 Result Flagging Color:    
 Result Flagging Label: RIN: 6.10

**Fragment table for sample 6 : 9S**

| Name | Start Size [nt] | End Size [nt] | Area | % of total Area |
|------|-----------------|---------------|------|-----------------|
| 18S  | 2,841           | 3,710         | 80.0 | 10.2            |
| 25S  | 5,159           | 6,053         | 88.1 | 11.2            |

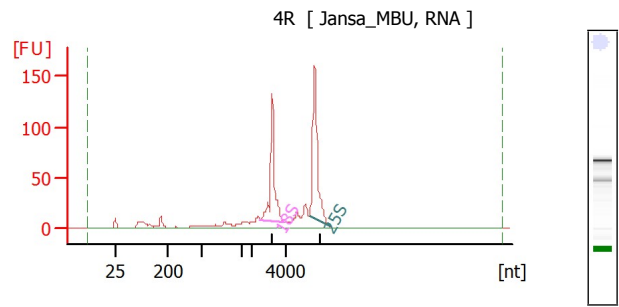

**Overall Results for sample 7 : 4R**  
 RNA Area: 698.1  
 RNA Concentration: 492 ng/µl  
 rRNA Ratio [25s / 18s]: 1.3  
 RNA Integrity Number (RIN): 9 (B.02.08)  
 Result Flagging Color:    
 Result Flagging Label: RIN:9

**Fragment table for sample 7 : 4R**

| Name | Start Size [nt] | End Size [nt] | Area  | % of total Area |
|------|-----------------|---------------|-------|-----------------|
| 18S  | 2,497           | 3,852         | 161.0 | 23.1            |
| 25S  | 5,281           | 6,442         | 210.7 | 30.2            |

Assay Class: Plant RNA Nano  
 Data Path: D:\...00 expert\_Plant RNA Nano\_DE34904209\_2015-04-22\_12-16-22.xad

Created: 4/22/2015 12:16:22 PM  
 Modified: 4/22/2015 12:40:15 PM

**Electropherogram Summary Continued ...**

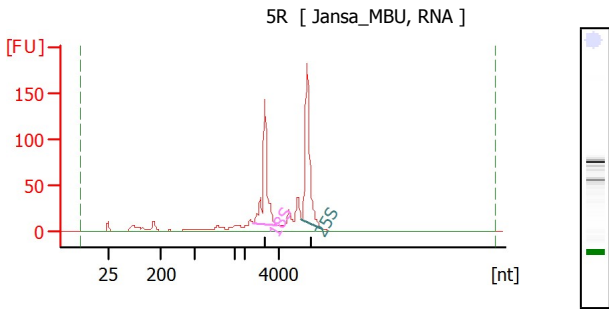

**Overall Results for sample 8 : 5R**  
 RNA Area: 744.3  
 RNA Concentration: 525 ng/µl  
 rRNA Ratio [25s / 18s]: 1.2  
 RNA Integrity Number (RIN): 9.2 (B.02.08)  
 Result Flagging Color:    
 Result Flagging Label: RIN: 9.20

**Fragment table for sample 8 : 5R**

| Name | Start Size [nt] | End Size [nt] | Area  | % of total Area |
|------|-----------------|---------------|-------|-----------------|
| 18S  | 2,497           | 3,877         | 186.3 | 25.0            |
| 25S  | 5,256           | 6,442         | 225.3 | 30.3            |

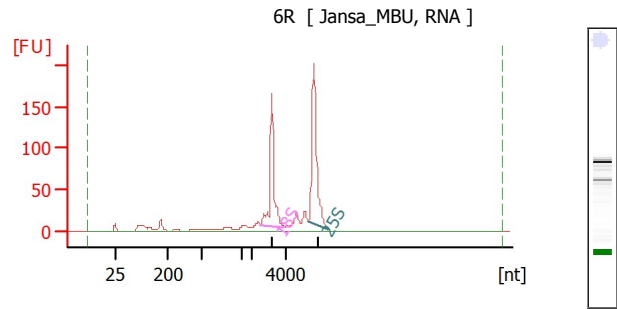

**Overall Results for sample 9 : 6R**  
 RNA Area: 789.3  
 RNA Concentration: 557 ng/µl  
 rRNA Ratio [25s / 18s]: 1.4  
 RNA Integrity Number (RIN): 9.4 (B.02.08)  
 Result Flagging Color:    
 Result Flagging Label: RIN: 9.40

**Fragment table for sample 9 : 6R**

| Name | Start Size [nt] | End Size [nt] | Area  | % of total Area |
|------|-----------------|---------------|-------|-----------------|
| 18S  | 2,497           | 3,852         | 193.0 | 24.5            |
| 25S  | 5,232           | 6,394         | 269.3 | 34.1            |

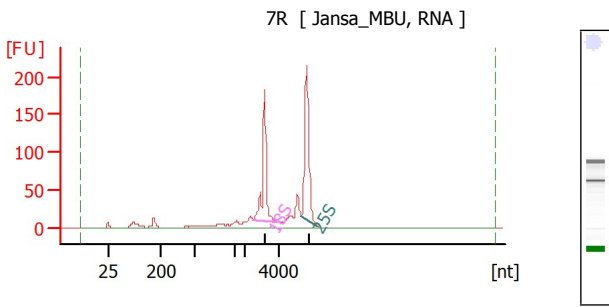

**Overall Results for sample 10 : 7R**  
 RNA Area: 864.7  
 RNA Concentration: 610 ng/µl  
 rRNA Ratio [25s / 18s]: 1.2  
 RNA Integrity Number (RIN): 8.9 (B.02.08)  
 Result Flagging Color:    
 Result Flagging Label: RIN: 8.90

**Fragment table for sample 10 : 7R**

| Name | Start Size [nt] | End Size [nt] | Area  | % of total Area |
|------|-----------------|---------------|-------|-----------------|
| 18S  | 2,473           | 3,852         | 203.0 | 23.5            |
| 25S  | 5,232           | 6,176         | 251.7 | 29.1            |

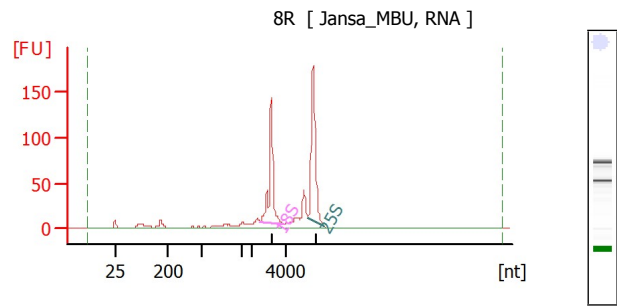

**Overall Results for sample 11 : 8R**  
 RNA Area: 662.8  
 RNA Concentration: 467 ng/µl  
 rRNA Ratio [25s / 18s]: 1.3  
 RNA Integrity Number (RIN): 9.3 (B.02.08)  
 Result Flagging Color:    
 Result Flagging Label: RIN: 9.30

**Fragment table for sample 11 : 8R**

| Name | Start Size [nt] | End Size [nt] | Area  | % of total Area |
|------|-----------------|---------------|-------|-----------------|
| 18S  | 2,449           | 3,852         | 166.7 | 25.2            |
| 25S  | 5,208           | 6,176         | 213.1 | 32.2            |

Assay Class: Plant RNA Nano  
 Data Path: D:\...00 expert\_Plant RNA Nano\_DE34904209\_2015-04-22\_12-16-22.xad

Created: 4/22/2015 12:16:22 PM  
 Modified: 4/22/2015 12:40:15 PM

**Electropherogram Summary Continued ...**

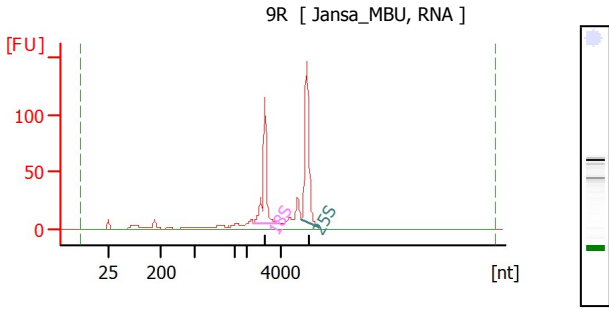

**Overall Results for sample 12 :** 9R  
 RNA Area: 526.1  
 RNA Concentration: 371 ng/ul  
 rRNA Ratio [25s / 18s]: 1.4  
 RNA Integrity Number (RIN): 9.2 (B.02.08)  
 Result Flagging Color:    
 Result Flagging Label: RIN: 9.20

**Fragment table for sample 12 :** 9R

| Name | Start Size [nt] | End Size [nt] | Area  | % of total Area |
|------|-----------------|---------------|-------|-----------------|
| 18S  | 2,455           | 3,807         | 123.6 | 23.5            |
| 25S  | 5,184           | 6,174         | 169.3 | 32.2            |

Assay Class: Plant RNA Nano  
Data Path: D:\...00 expert\_Plant RNA Nano\_DE34904209\_2015-04-22\_12-16-22.xad

Created: 4/22/2015 12:16:22 PM  
Modified: 4/22/2015 12:40:15 PM

**Gel Image**

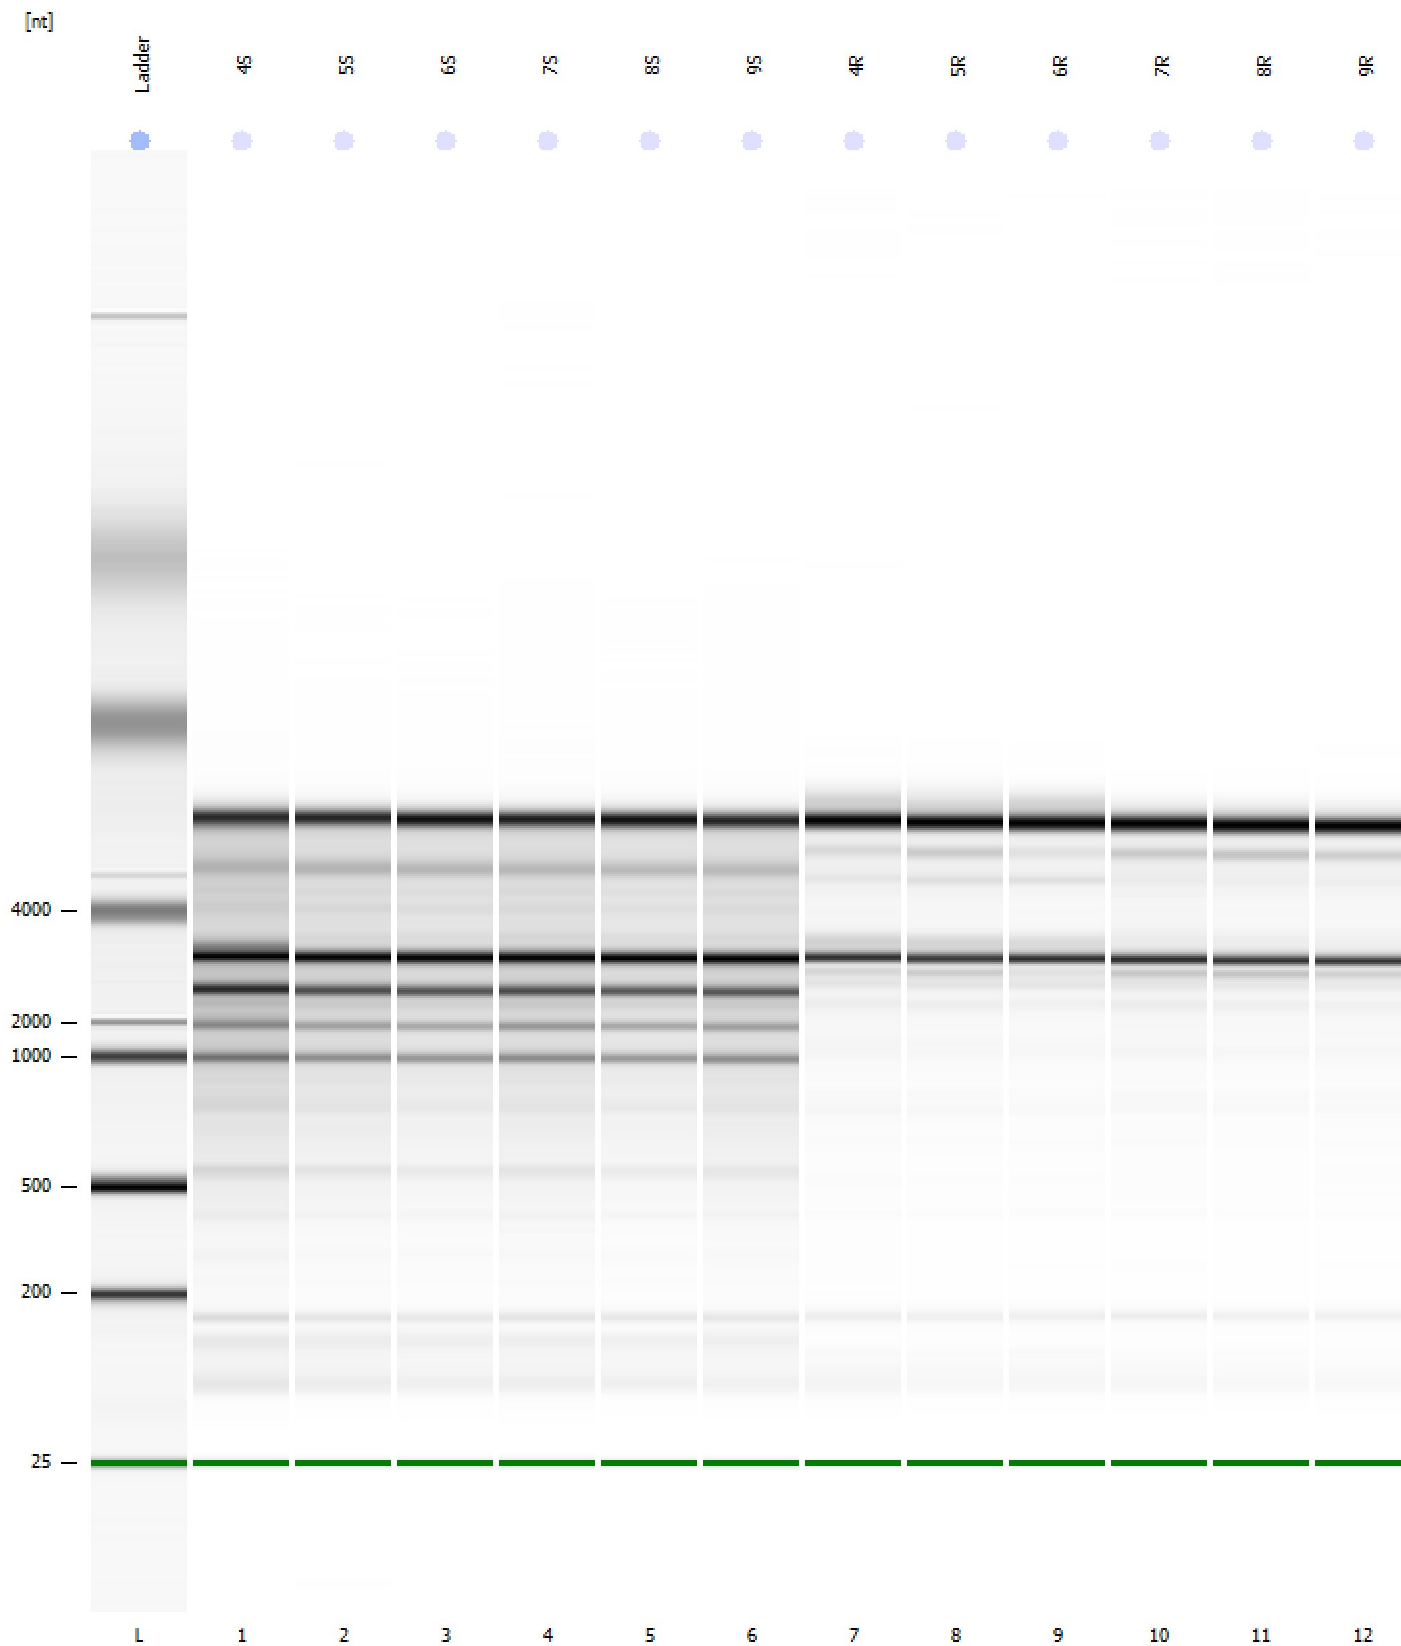



Assay Class: Plant RNA Nano  
 Data Path: D:\...00 expert\_Plant RNA Nano\_DE34904209\_2015-04-22\_12-16-22.xad

Created: 4/22/2015 12:16:22 PM  
 Modified: 4/22/2015 12:40:15 PM

**Run Logbook**

| Description                                                                                                            | Number | Source     | Category | Sub Category | Time                  | Time Zone                                 | User    | Host        |
|------------------------------------------------------------------------------------------------------------------------|--------|------------|----------|--------------|-----------------------|-------------------------------------------|---------|-------------|
| Run ended on port 1 (Number of wells acquired: 13)                                                                     |        | Instrument | Run      |              | 4/22/2015 12:40:13 PM | (GMT +02:00) Central Europe Standard Time | corelab | NAT4AGILENT |
| Run started on port 1 (File: D:\Agilent\data\2015-04-22\2100 expert_Plant RNA Nano_DE34904209_2015-04-22_12-16-22.xad) |        | Instrument | Run      |              | 4/22/2015 12:16:27 PM | (GMT +02:00) Central Europe Standard Time | corelab | NAT4AGILENT |
| Product Number : G2938C                                                                                                |        | Instrument | Run      |              | 4/22/2015 12:16:27 PM | (GMT +02:00) Central Europe Standard Time | corelab | NAT4AGILENT |
| Name : IMG-CORE-AGILENT                                                                                                |        | Instrument | Run      |              | 4/22/2015 12:16:27 PM | (GMT +02:00) Central Europe Standard Time | corelab | NAT4AGILENT |
| Vendor : Agilent Technologies                                                                                          |        | Instrument | Run      |              | 4/22/2015 12:16:27 PM | (GMT +02:00) Central Europe Standard Time | corelab | NAT4AGILENT |
| Serial# : DE34904209                                                                                                   |        | Instrument | Run      |              | 4/22/2015 12:16:27 PM | (GMT +02:00) Central Europe Standard Time | corelab | NAT4AGILENT |
| Firmware : C.01.069                                                                                                    |        | Instrument | Run      |              | 4/22/2015 12:16:27 PM | (GMT +02:00) Central Europe Standard Time | corelab | NAT4AGILENT |
| Cartridge : Electrode                                                                                                  |        | Instrument | Run      |              | 4/22/2015 12:16:27 PM | (GMT +02:00) Central Europe Standard Time | corelab | NAT4AGILENT |
