# Supplementary material for: Correlative evidence for co-regulation of phosphorus and carbon exchanges with symbiotic fungus in the arbuscular mycorrhizal Medicago truncatula
Source: PubMed Central journal article supplement (PMC6844471; doi:10.1371/journal.pone.0224938), 2019-11-11

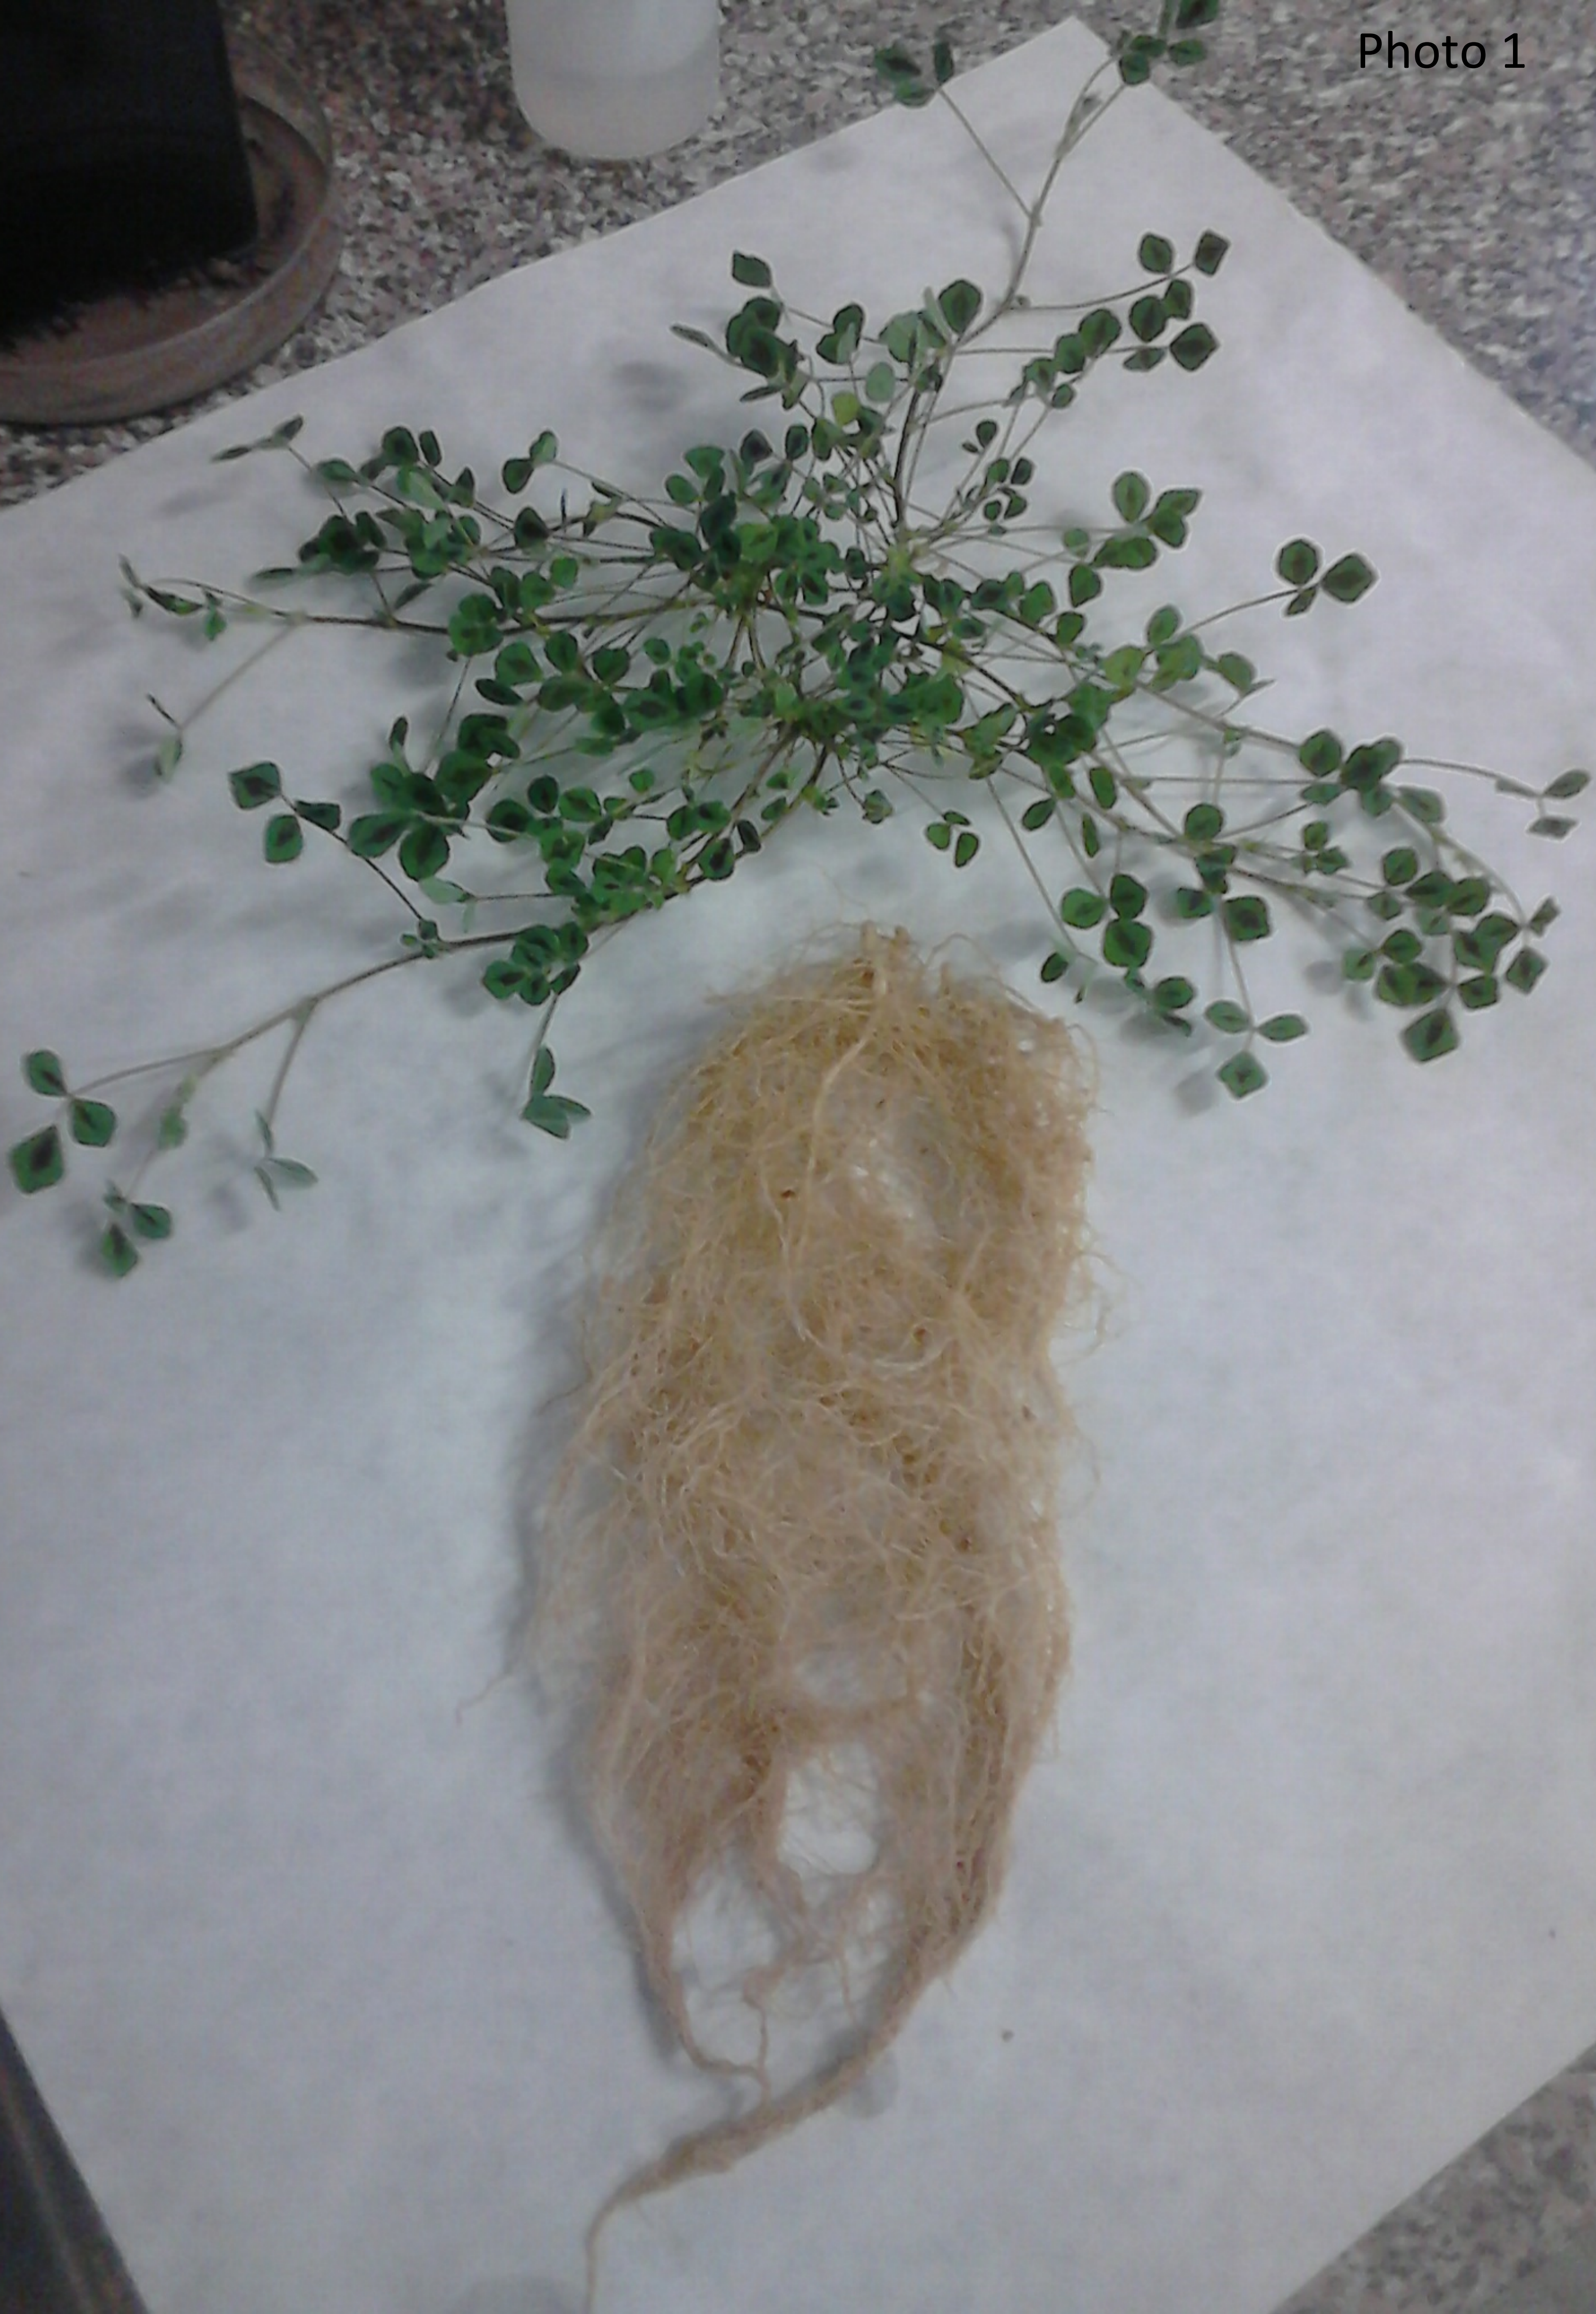

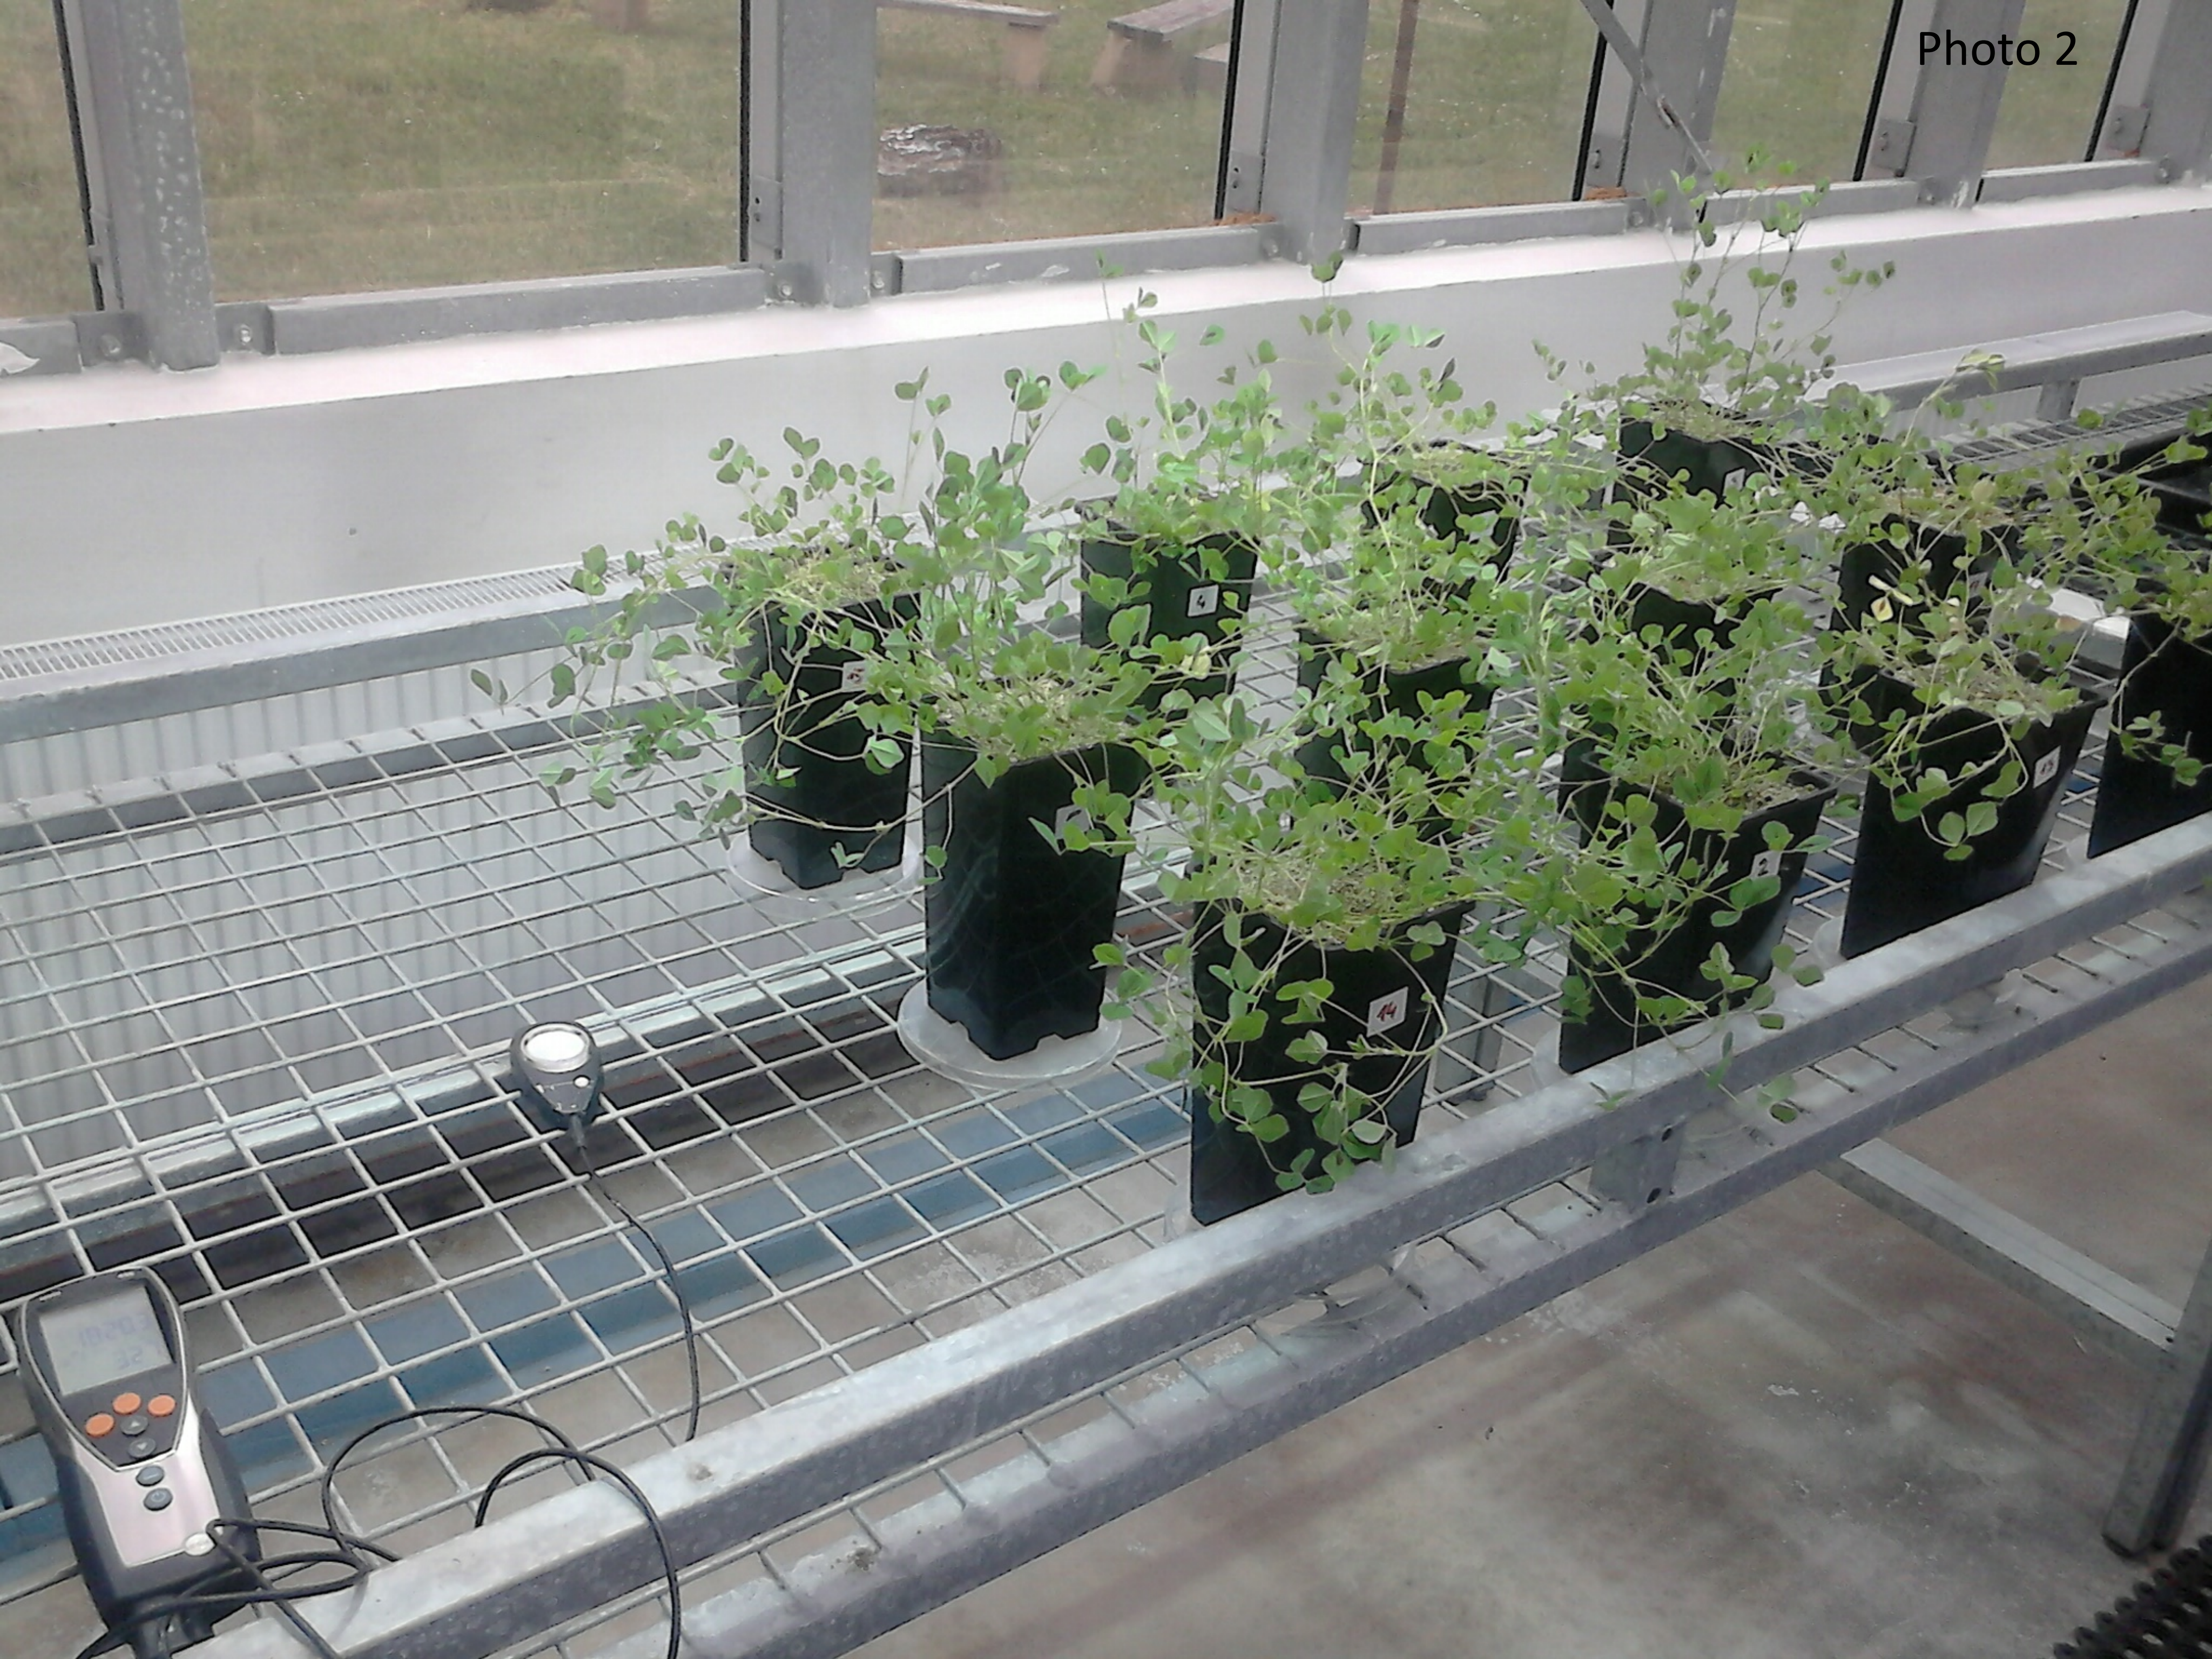

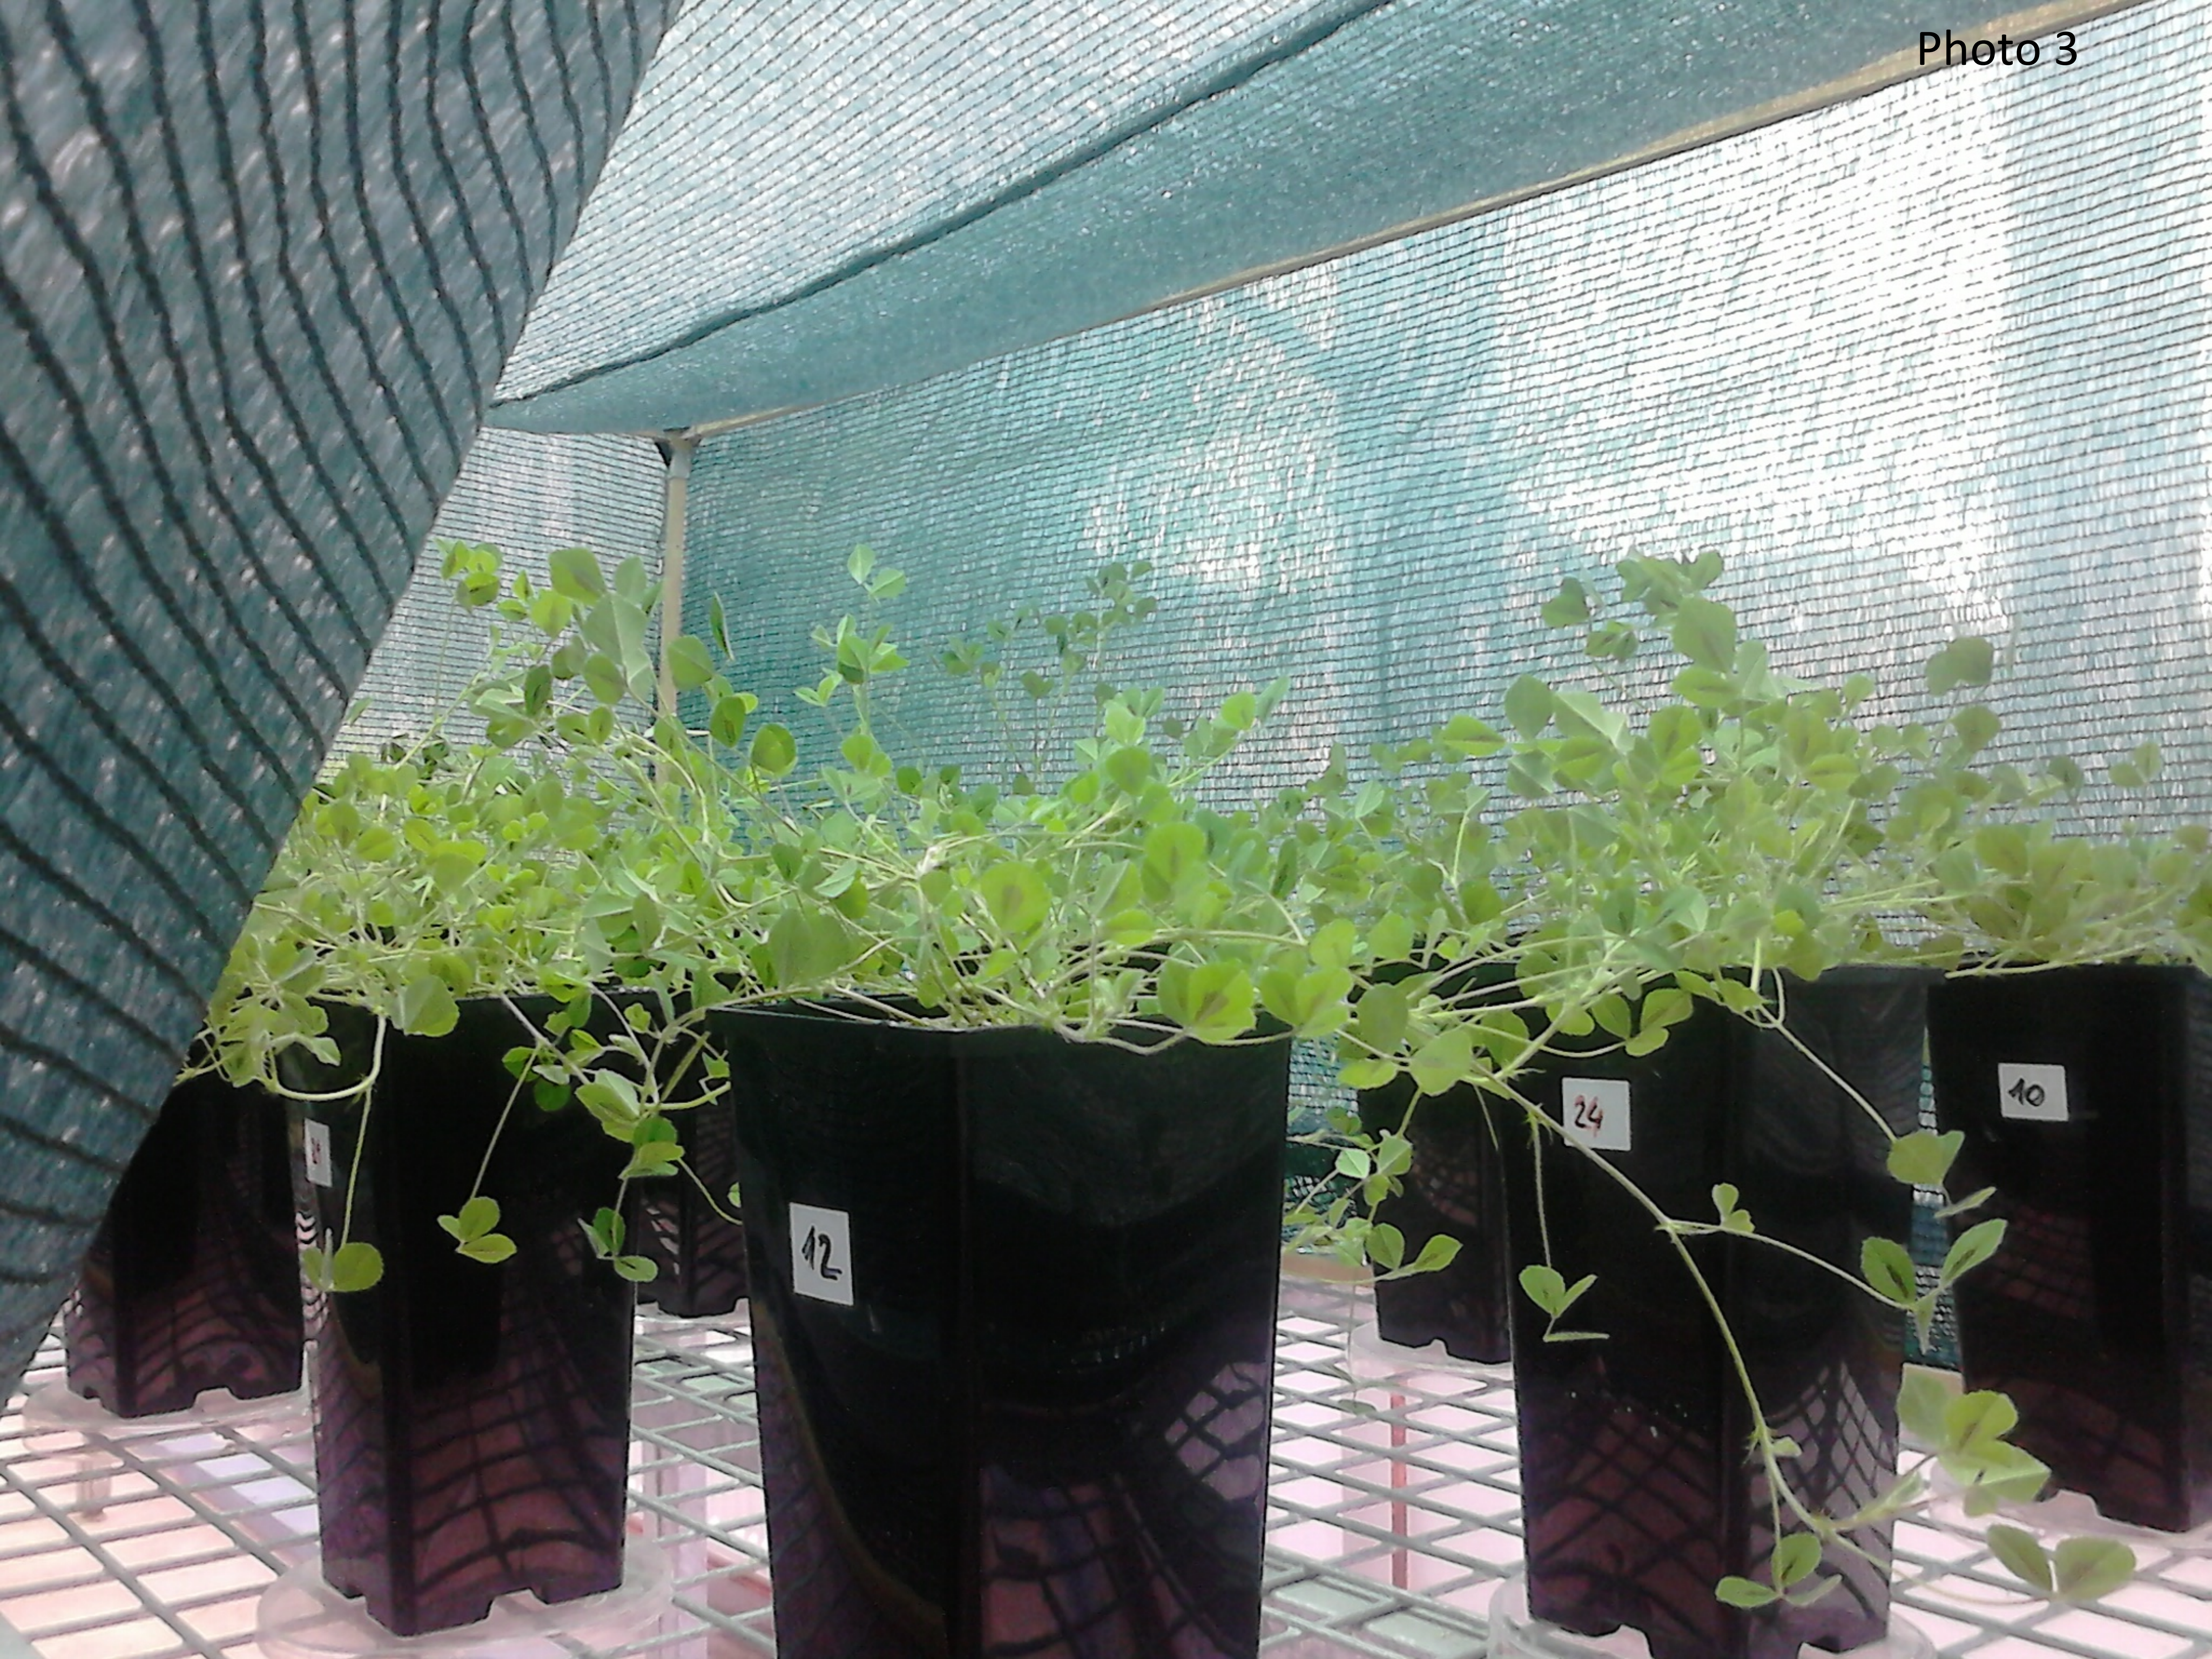

Supplement: pone.0224938.s011.pdf [file pone.0224938.s011.pdf]
